# Supplementary material for: Genomic DNA methylation profile in peripheral blood of children with congenital biliary dilatation
Source: Springer Nature journal article supplement (doi:10.1186/s12920-025-02223-3), 2025-10-23

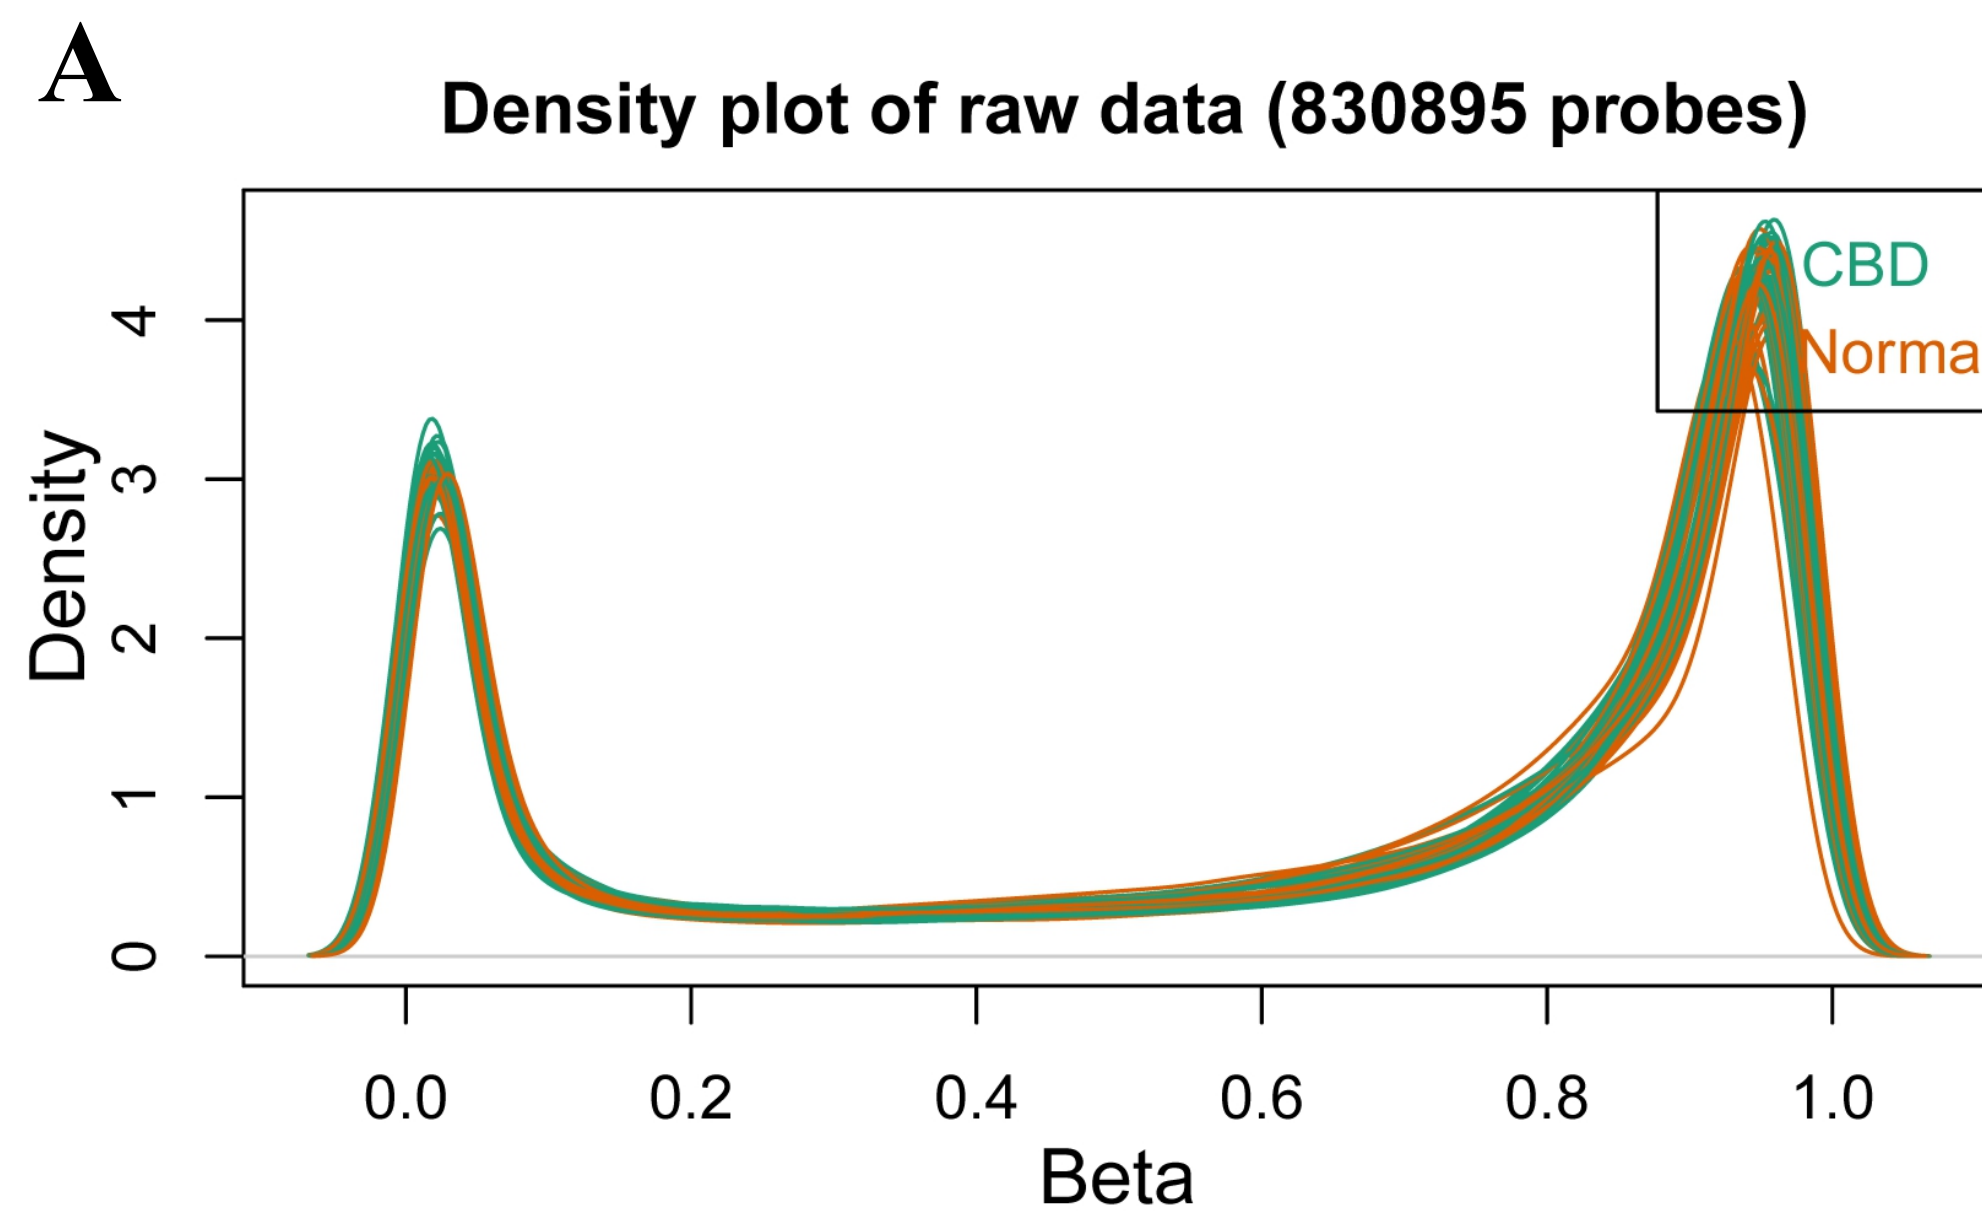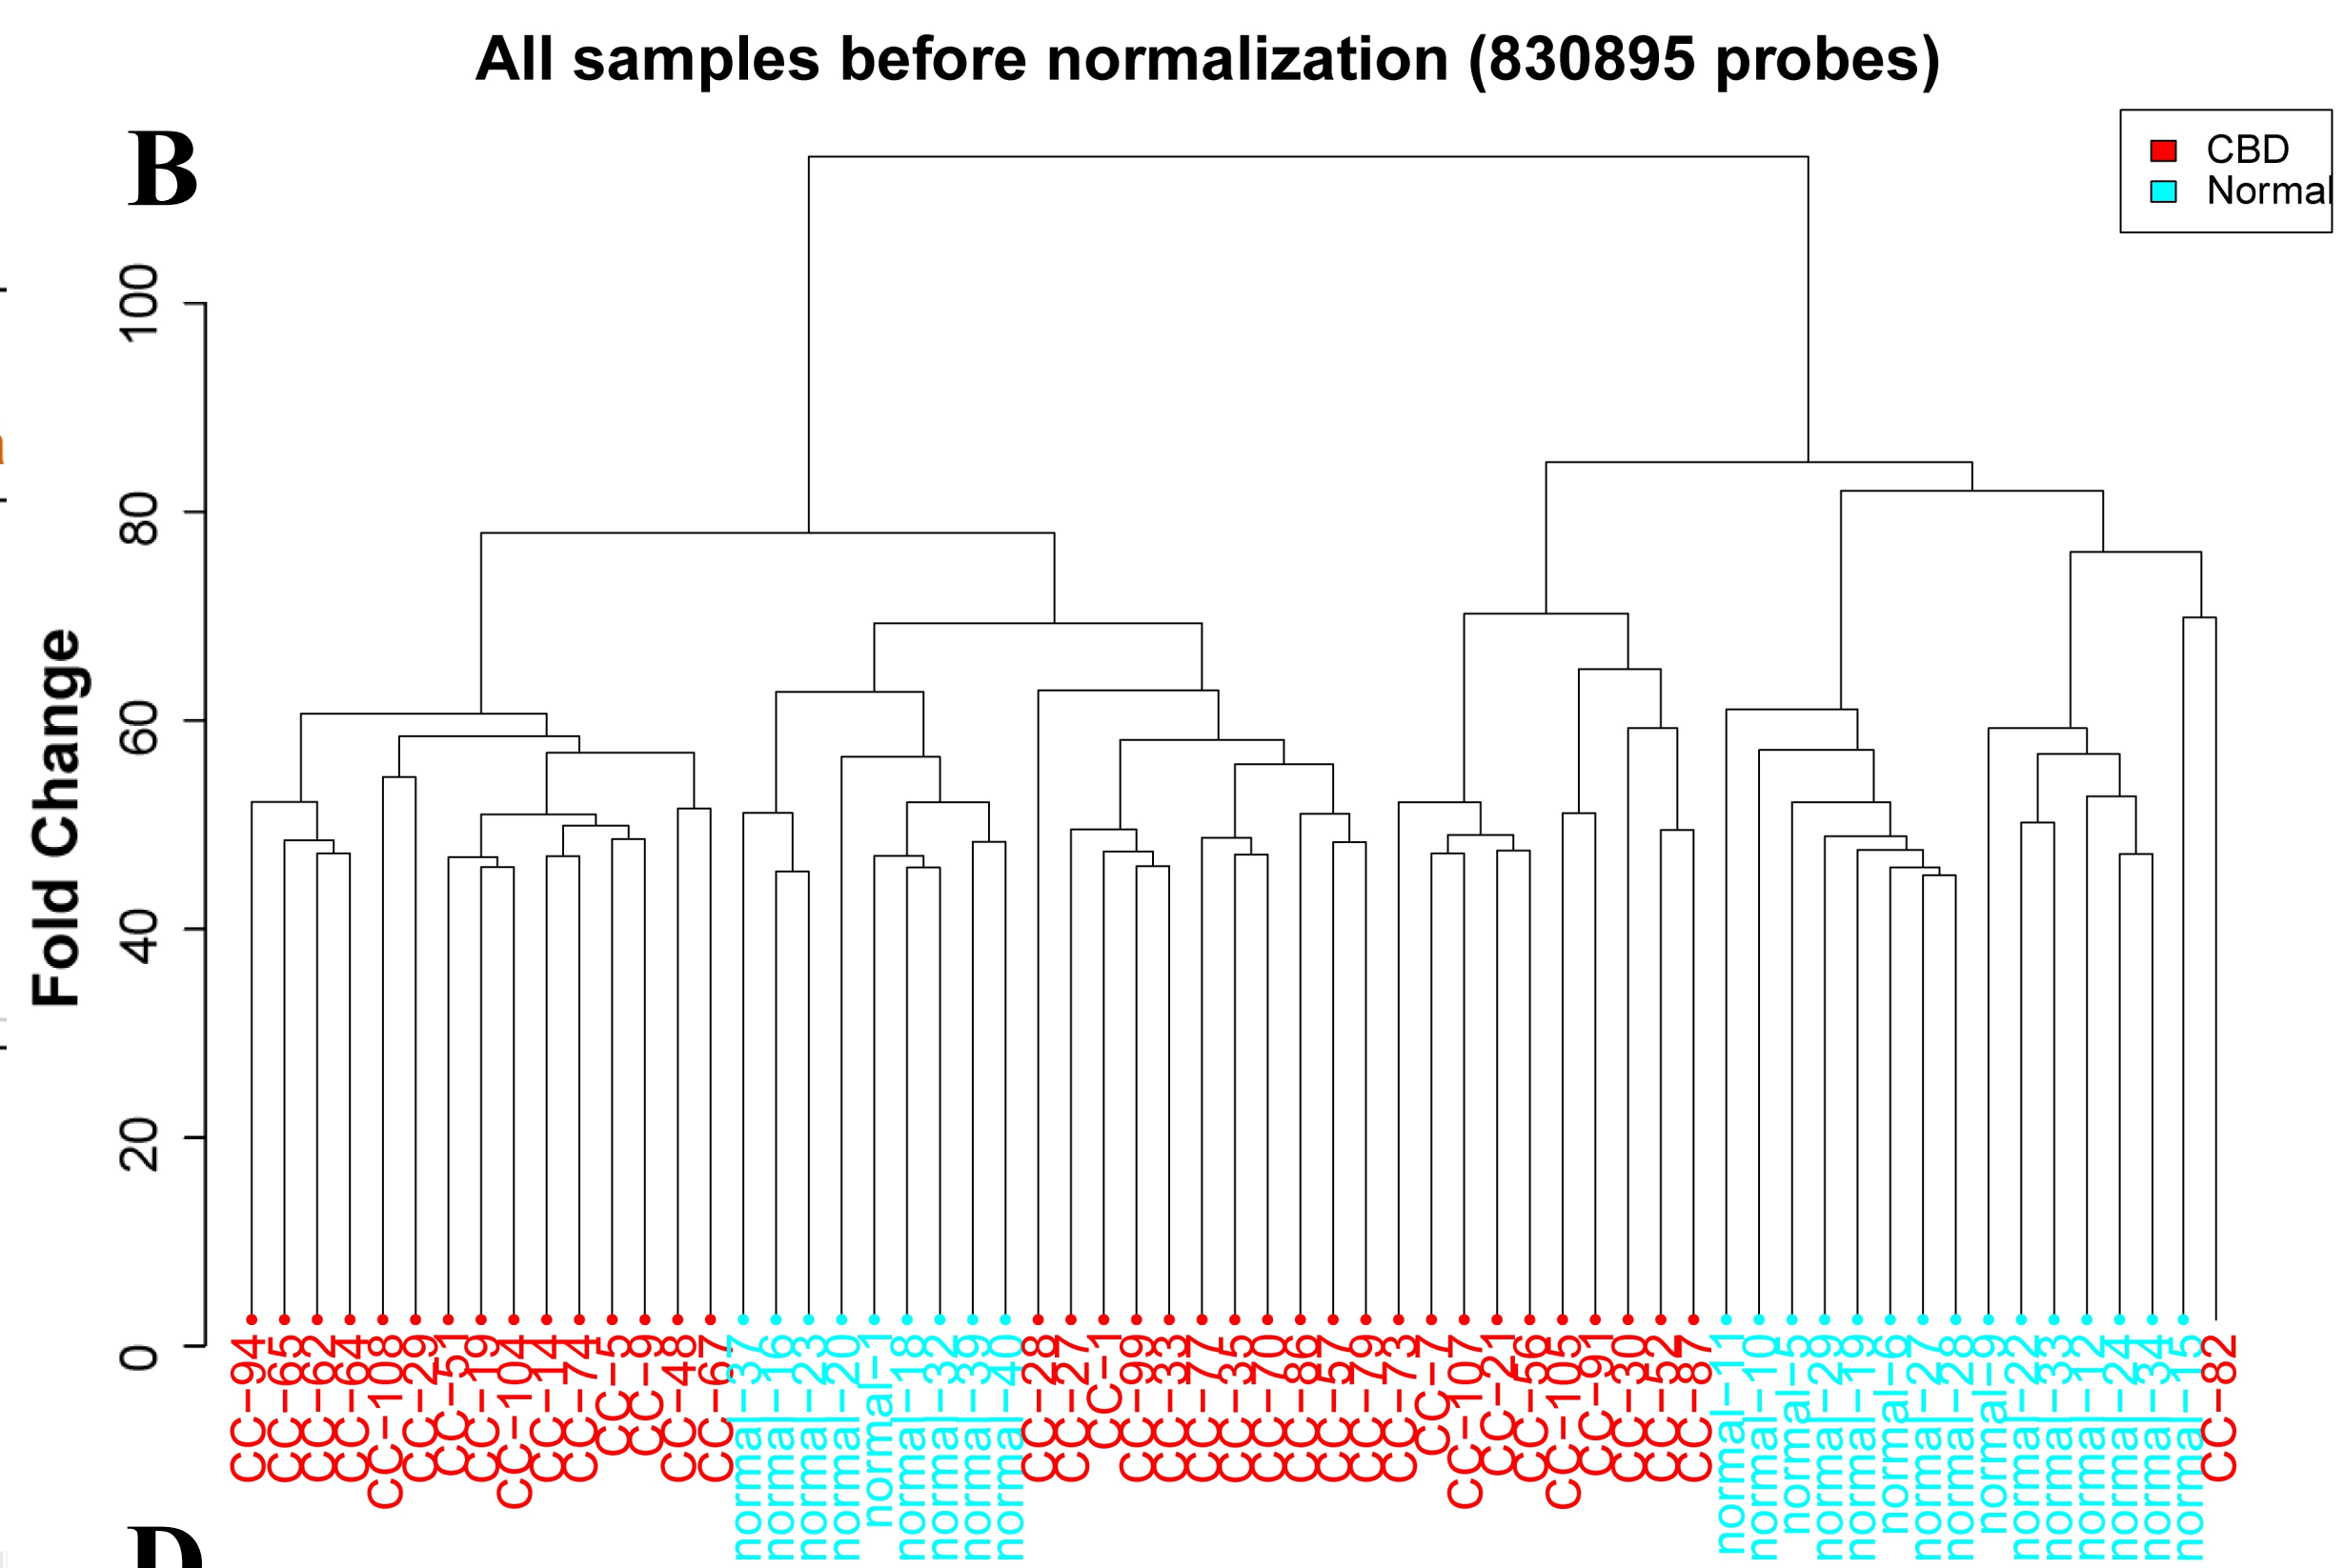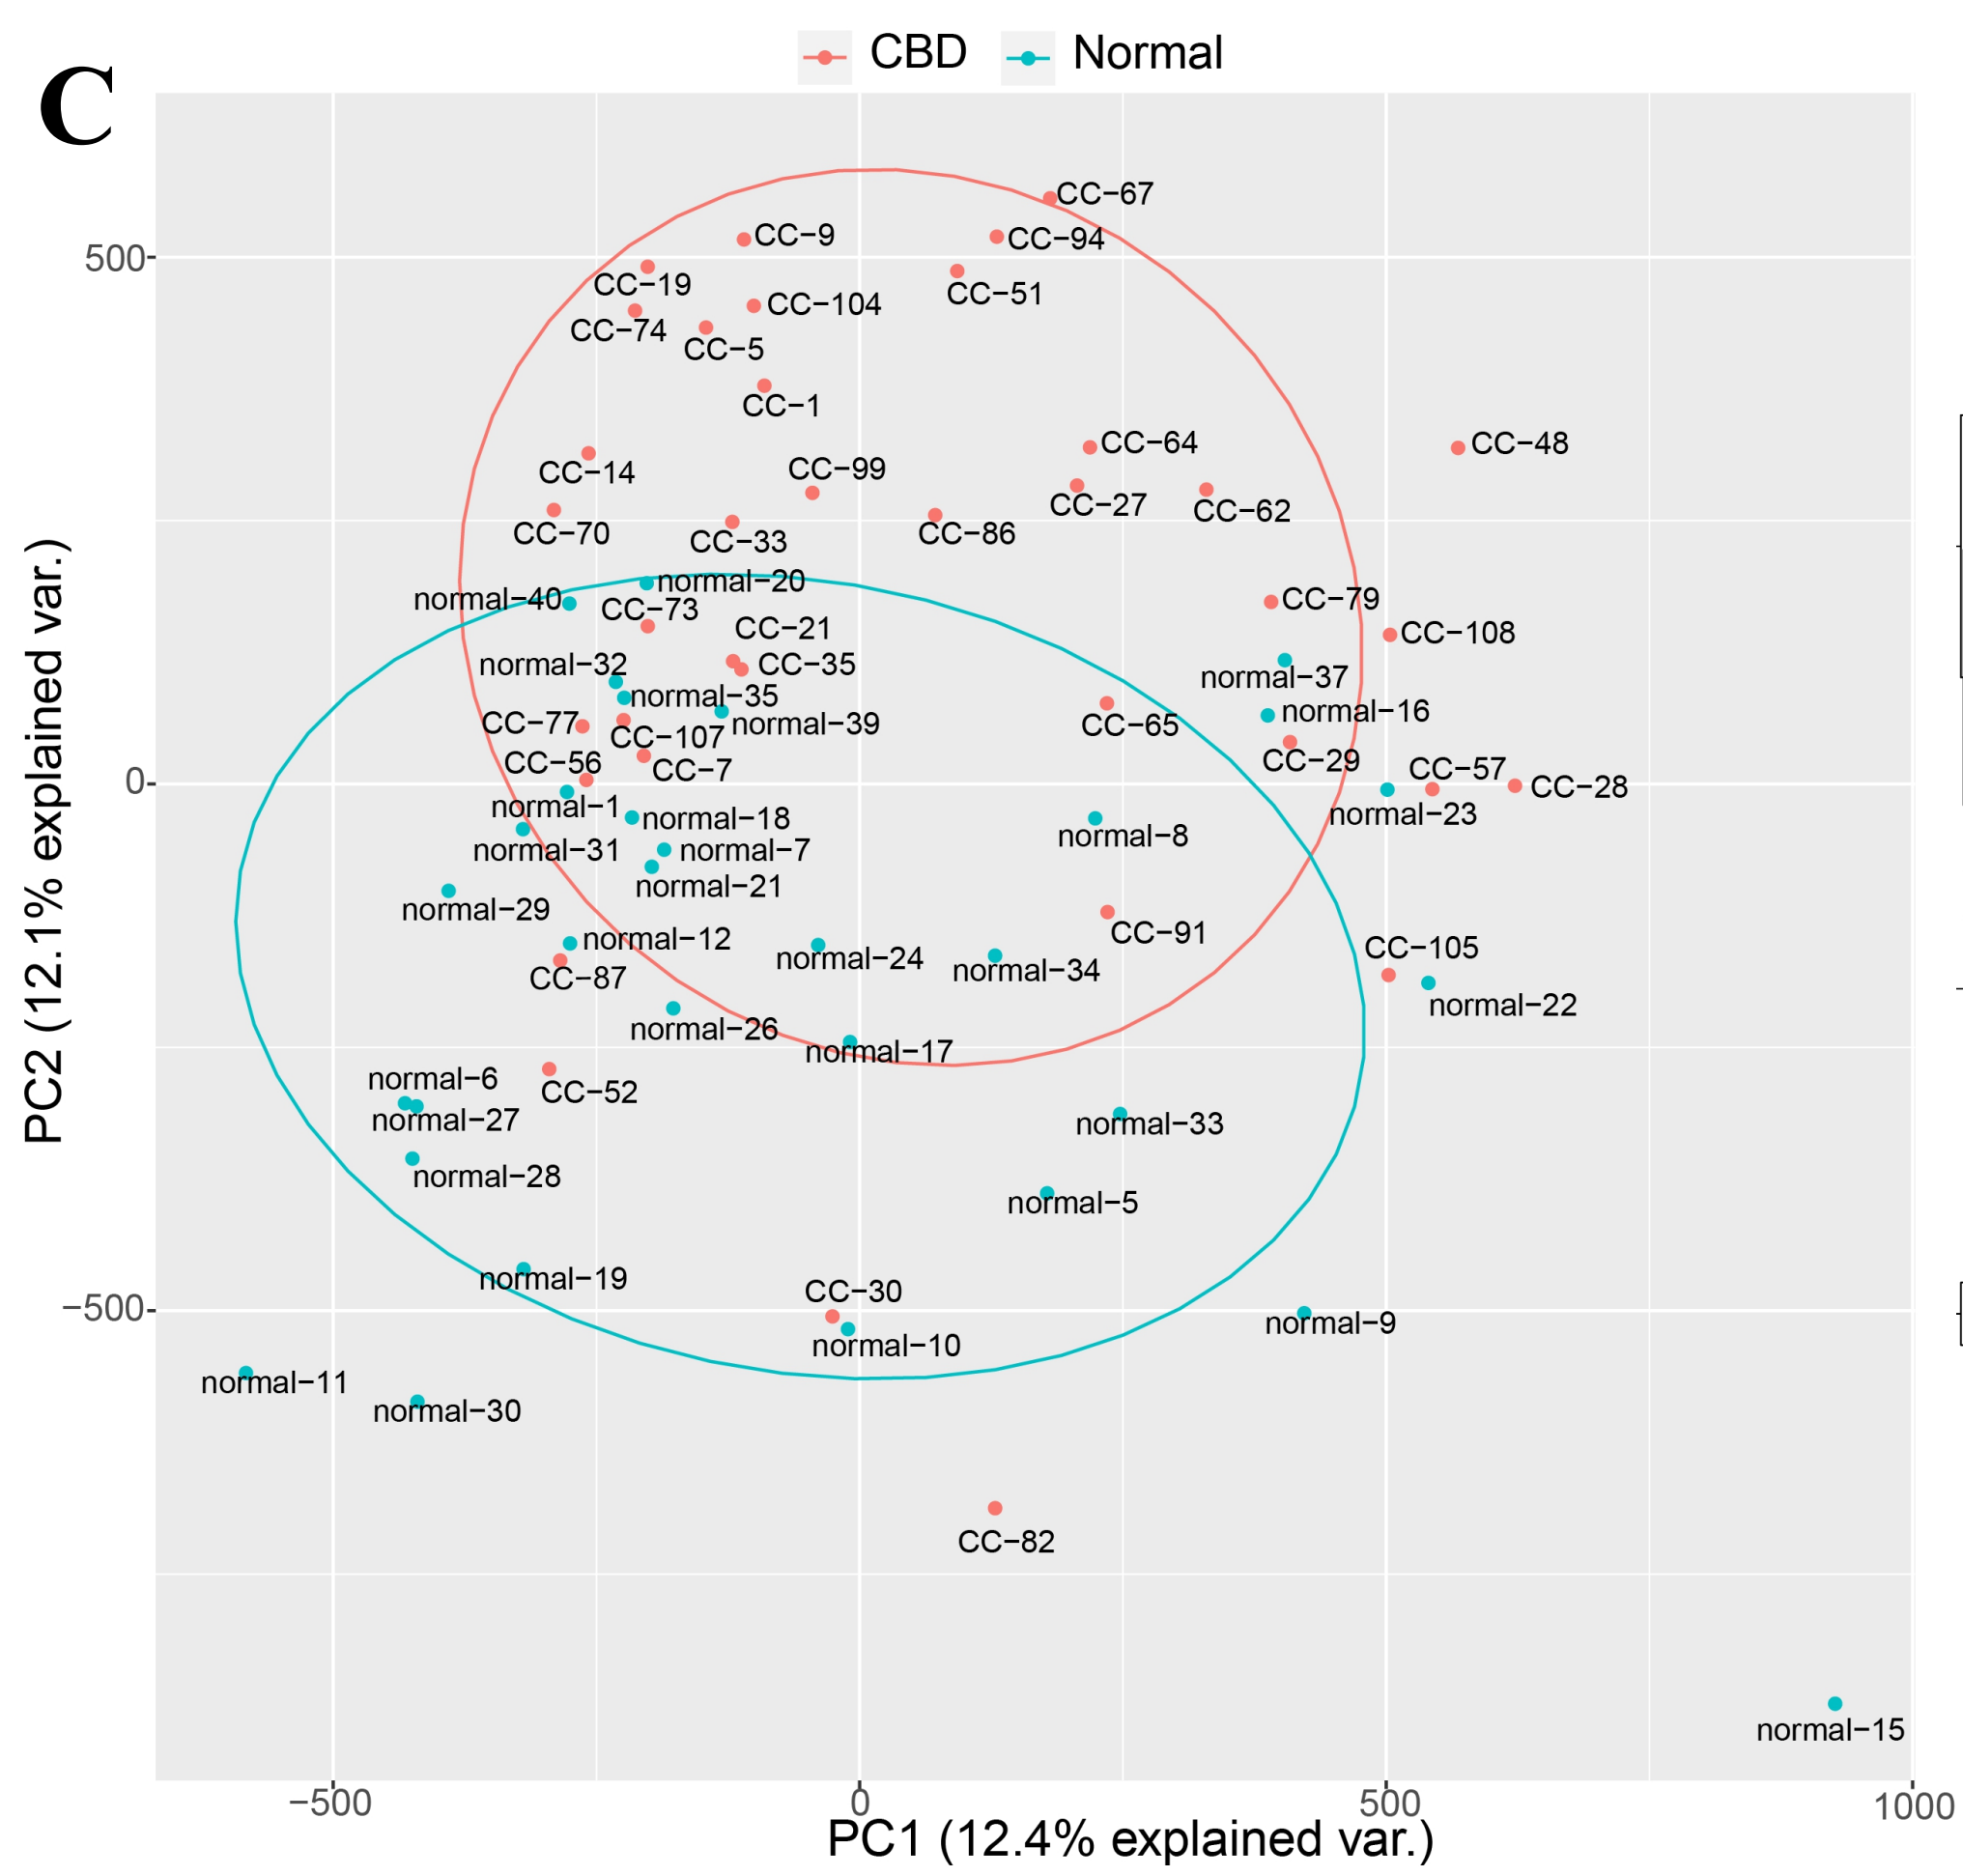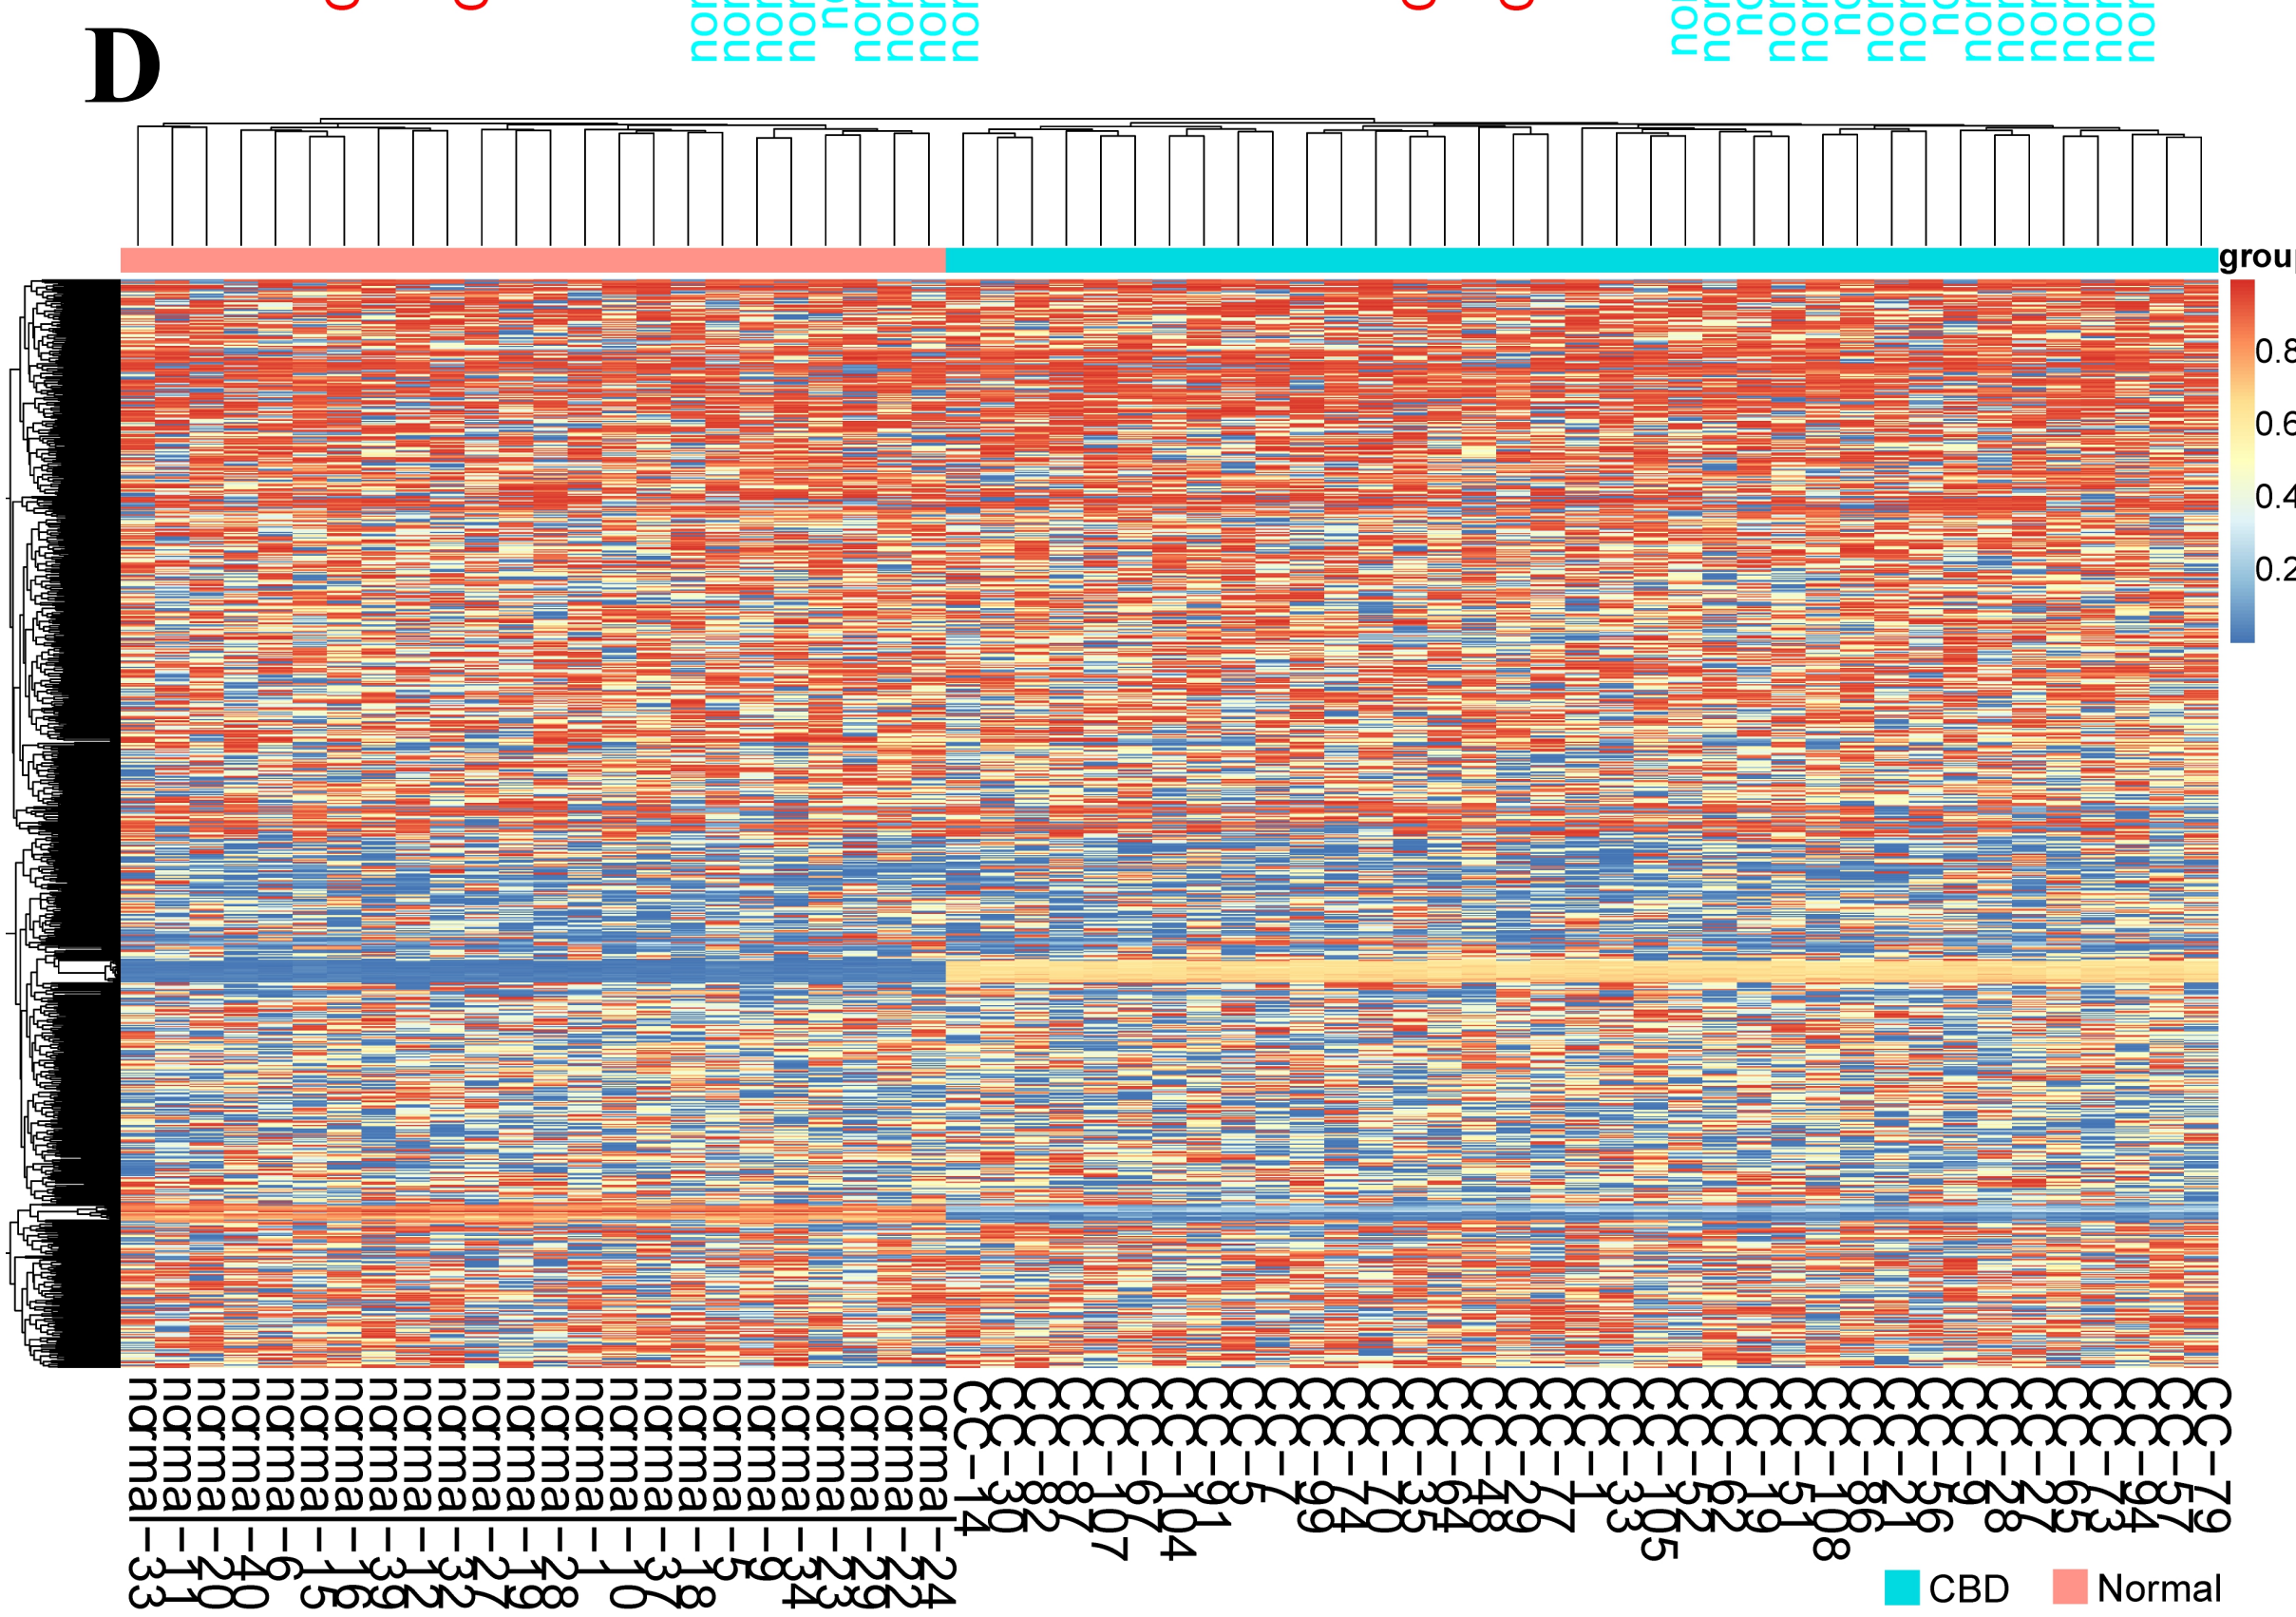

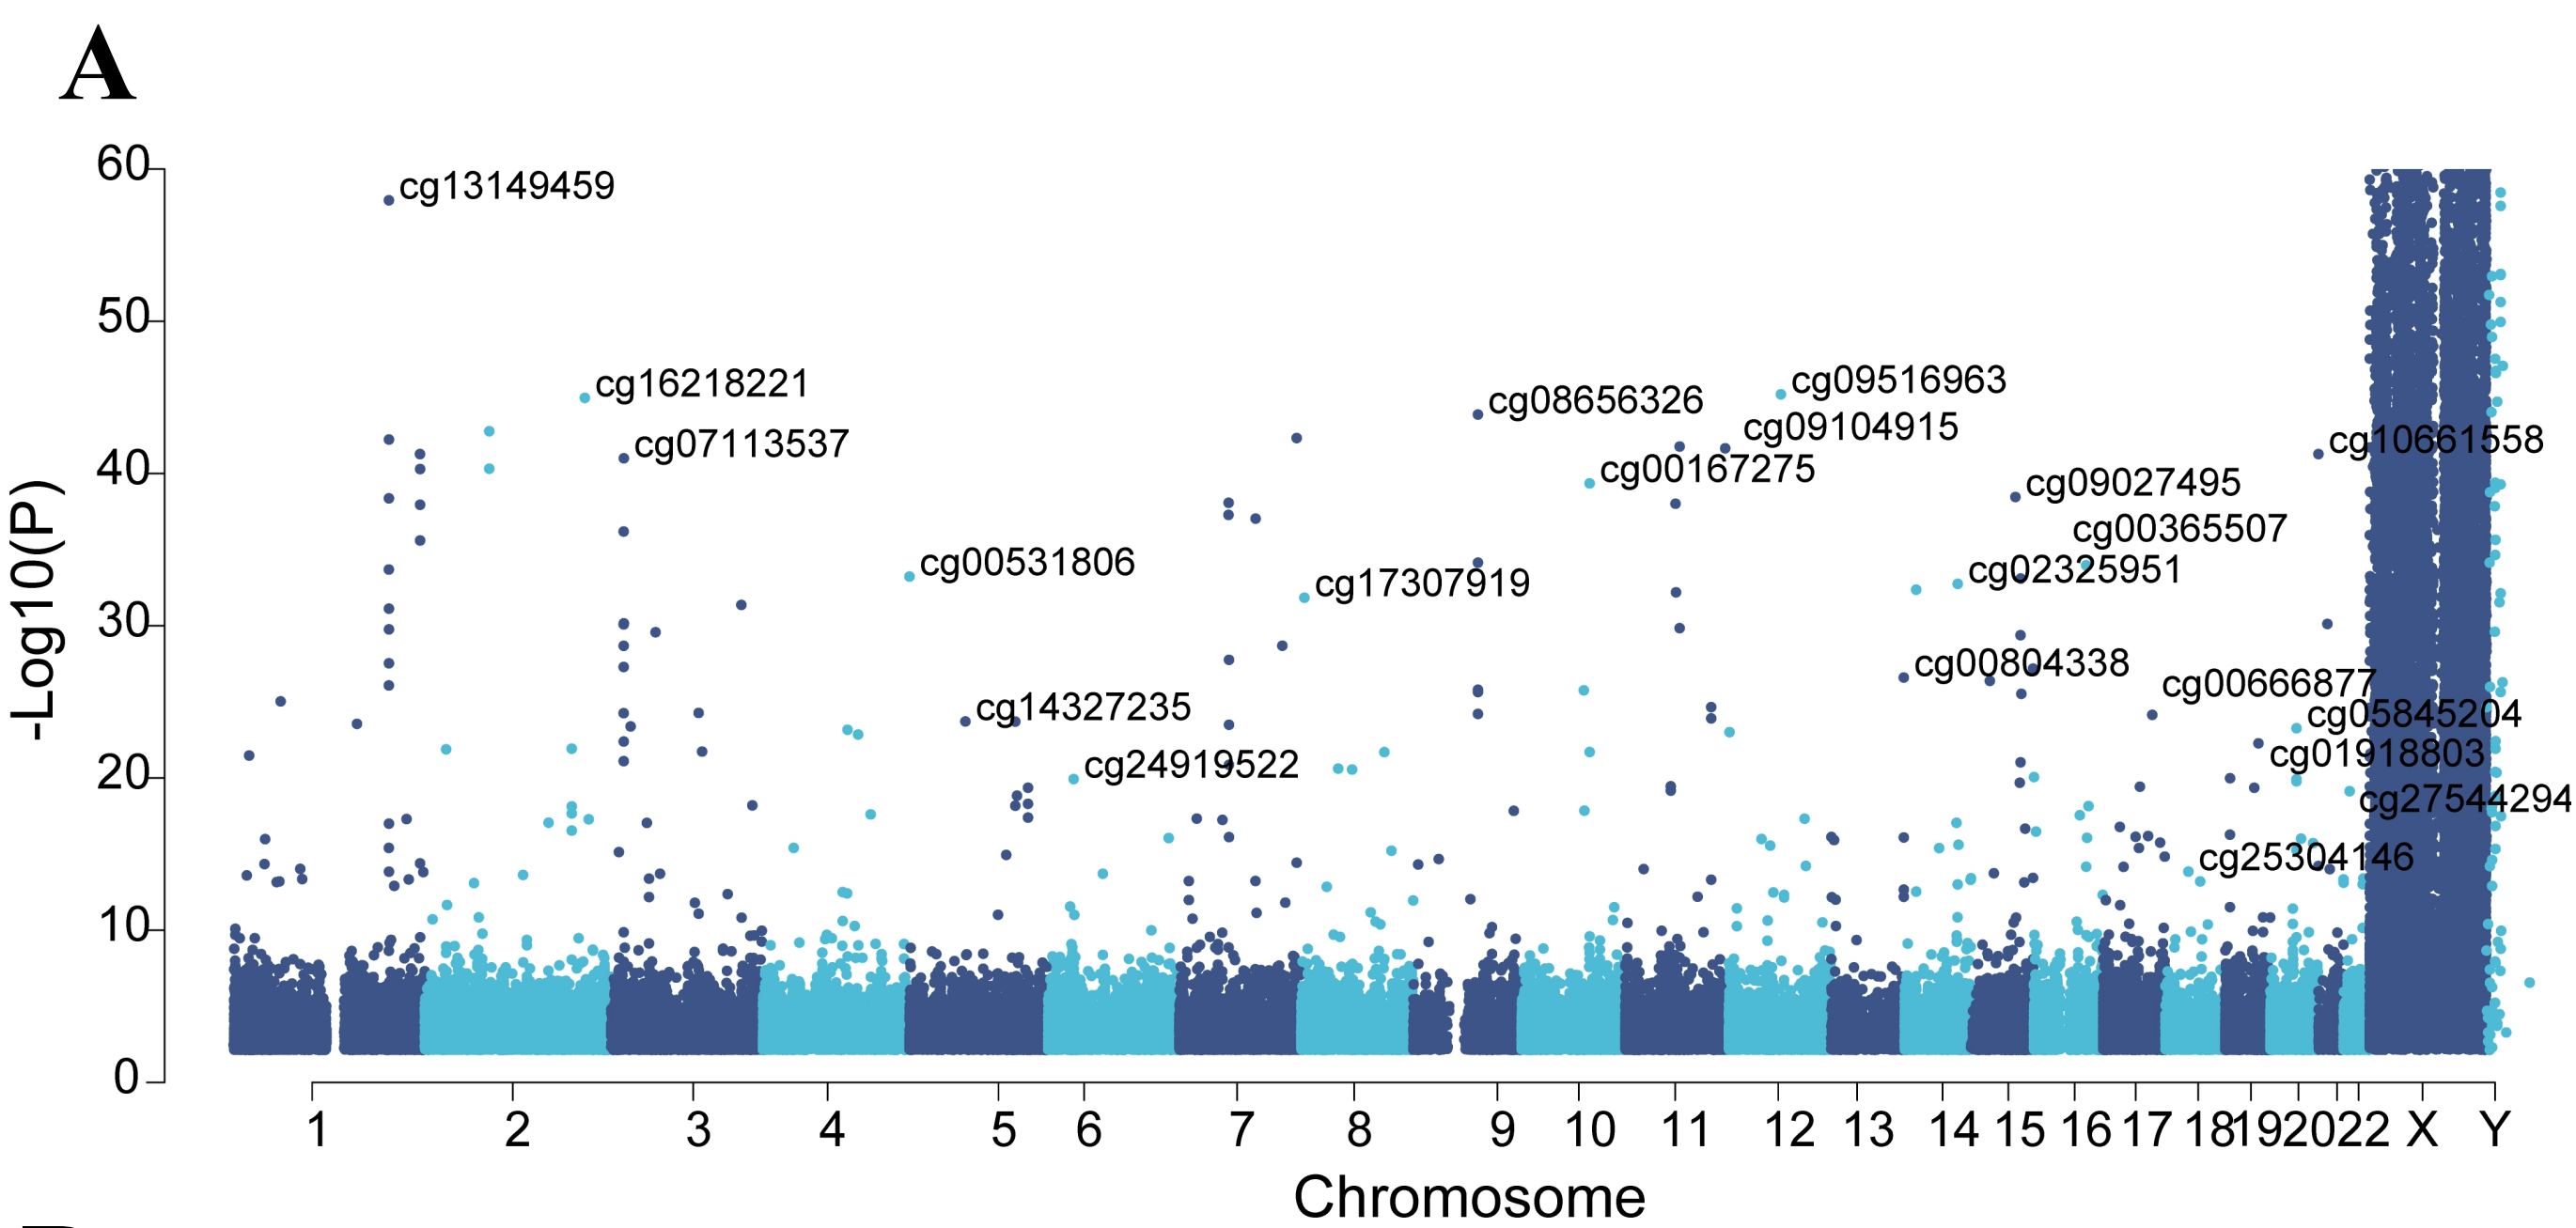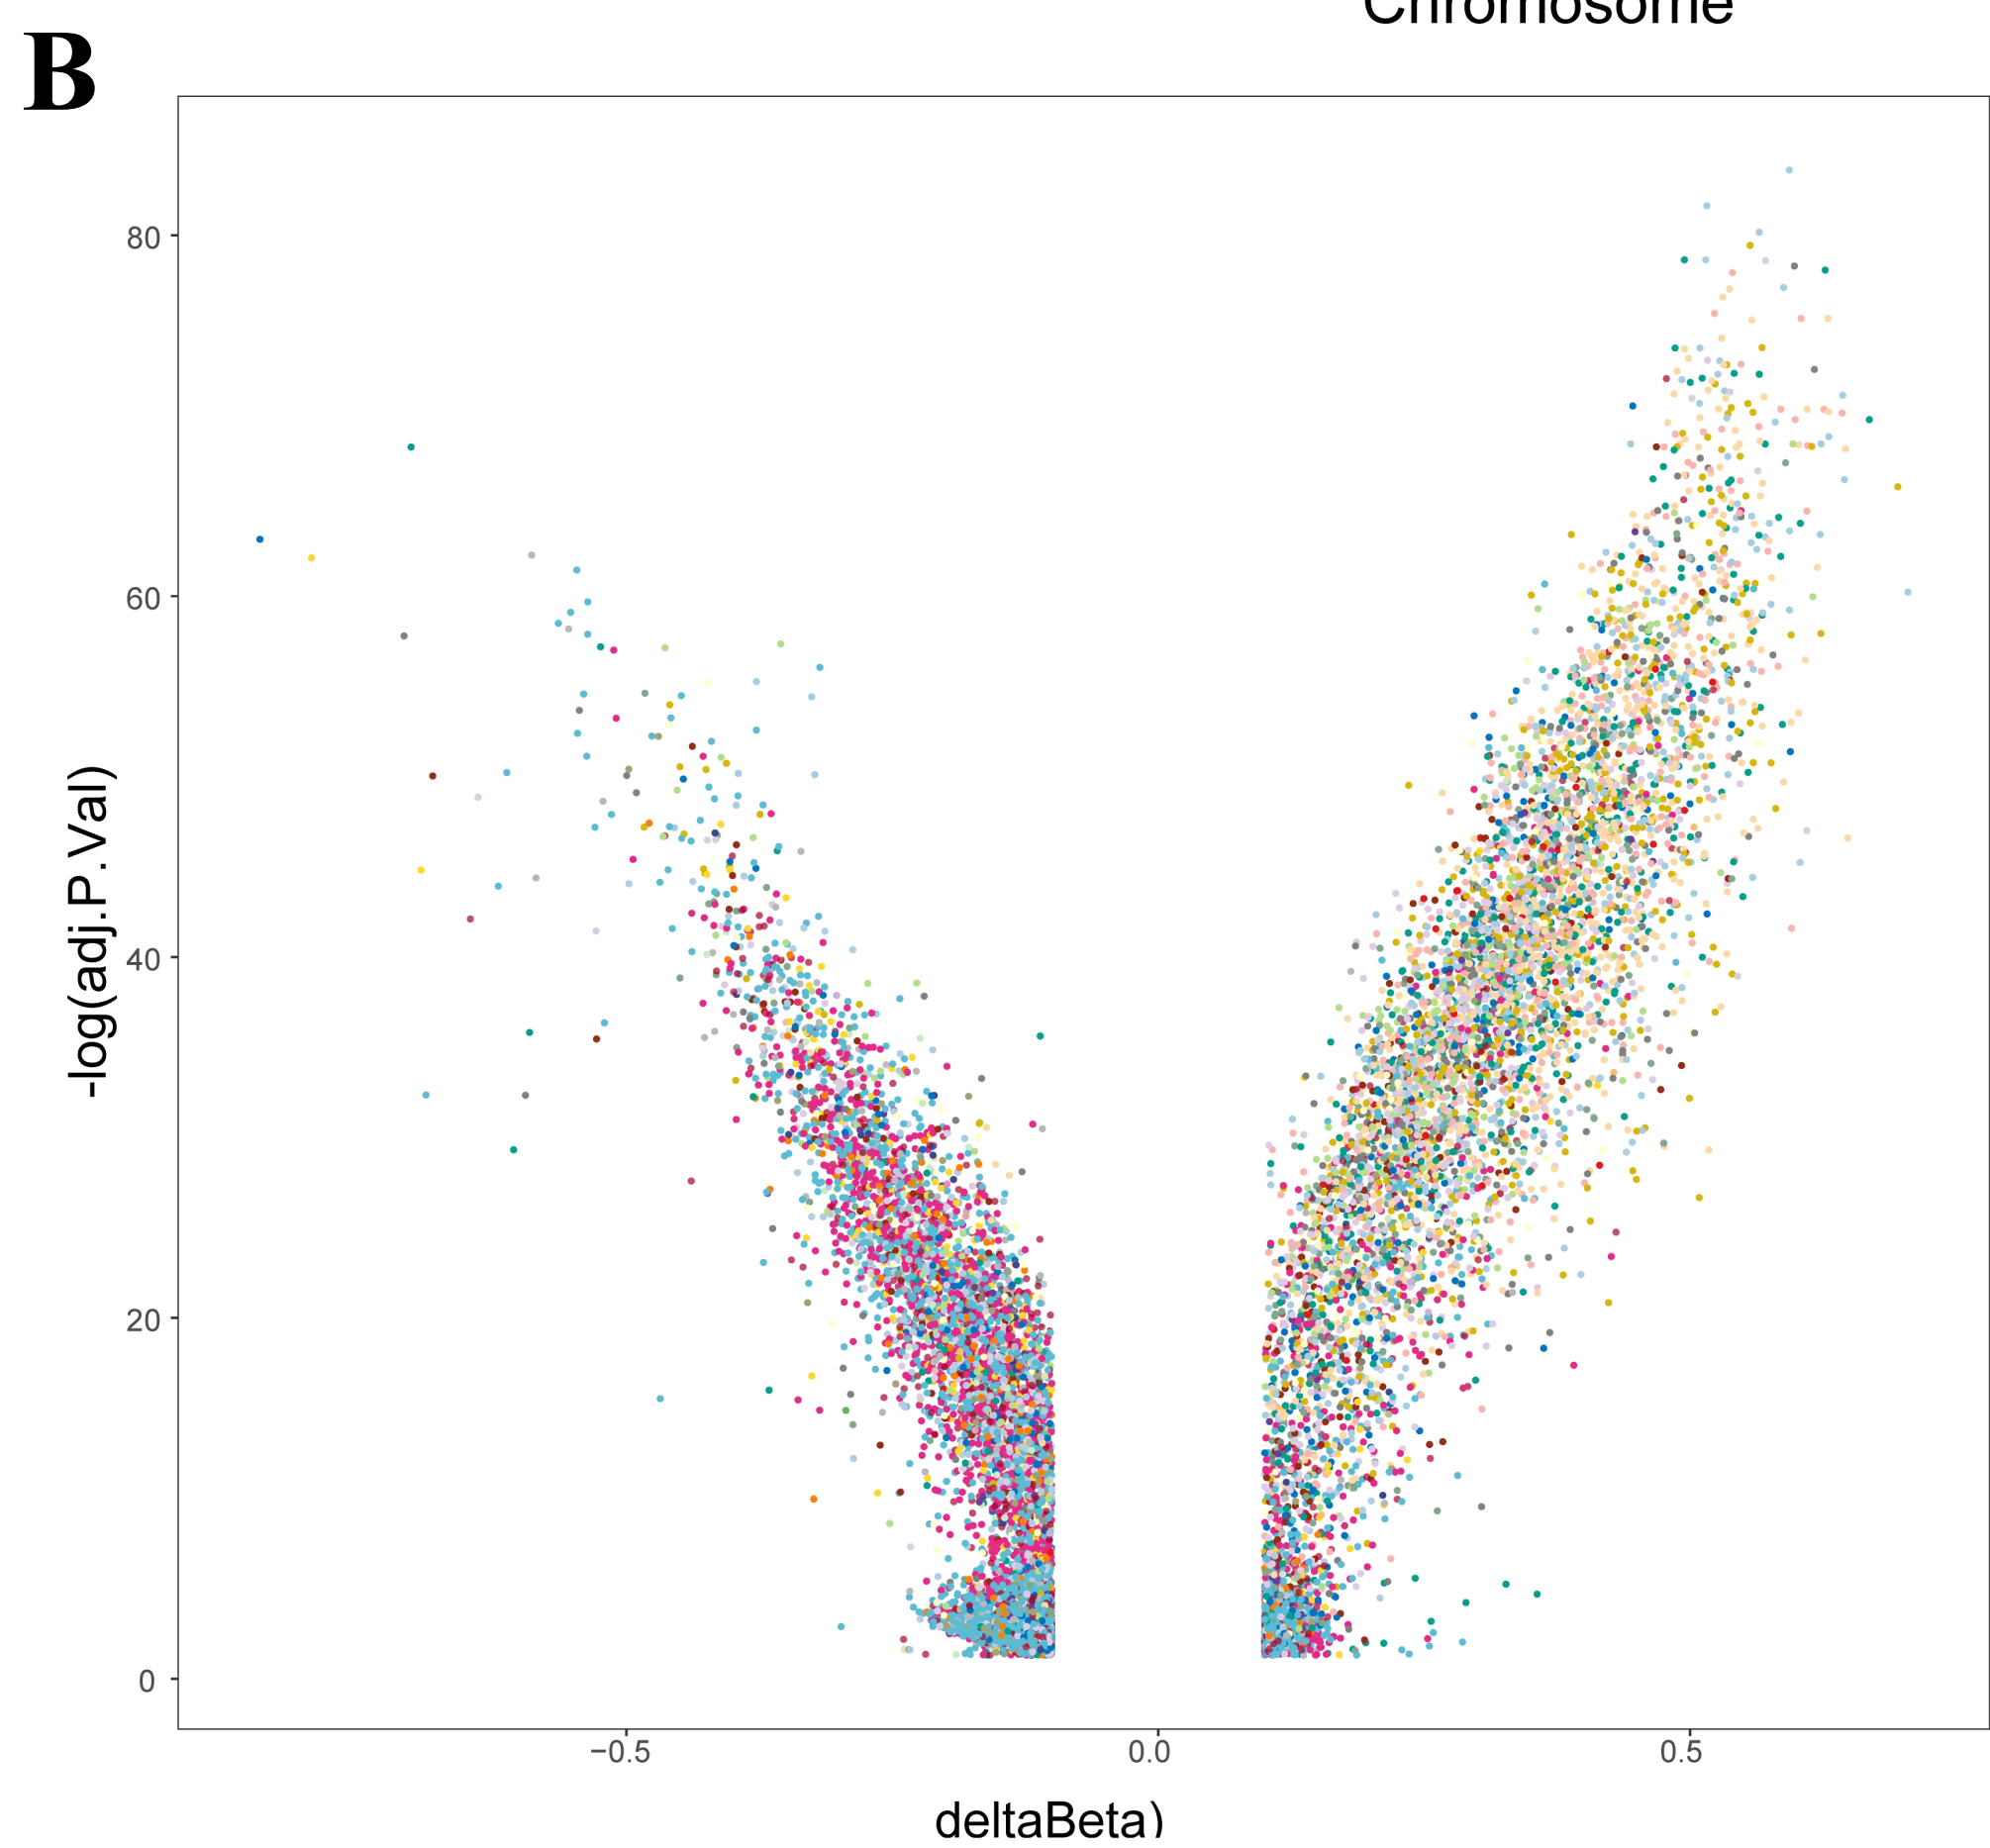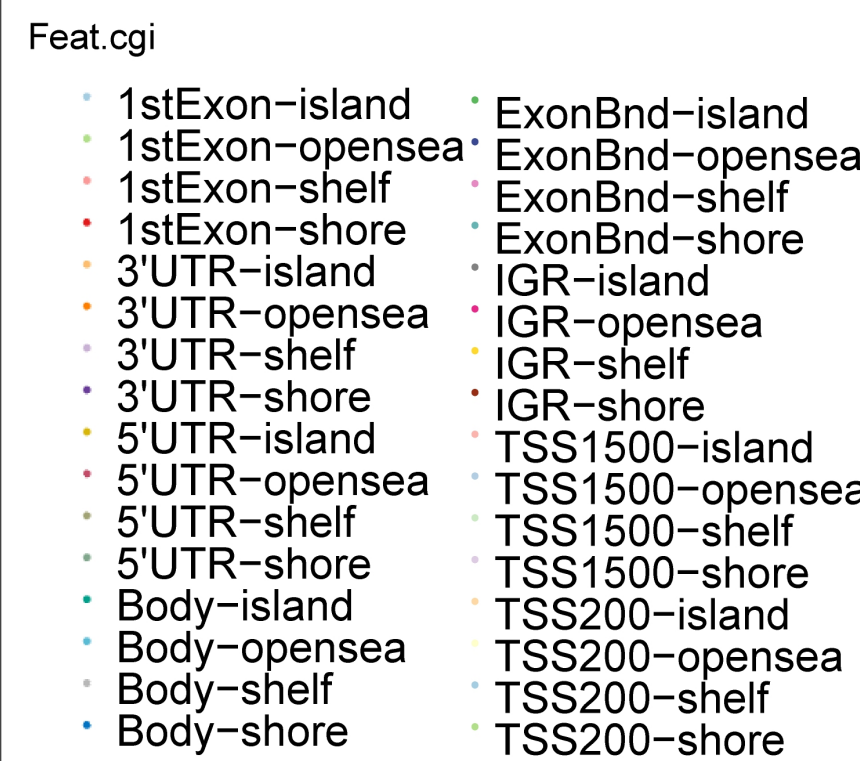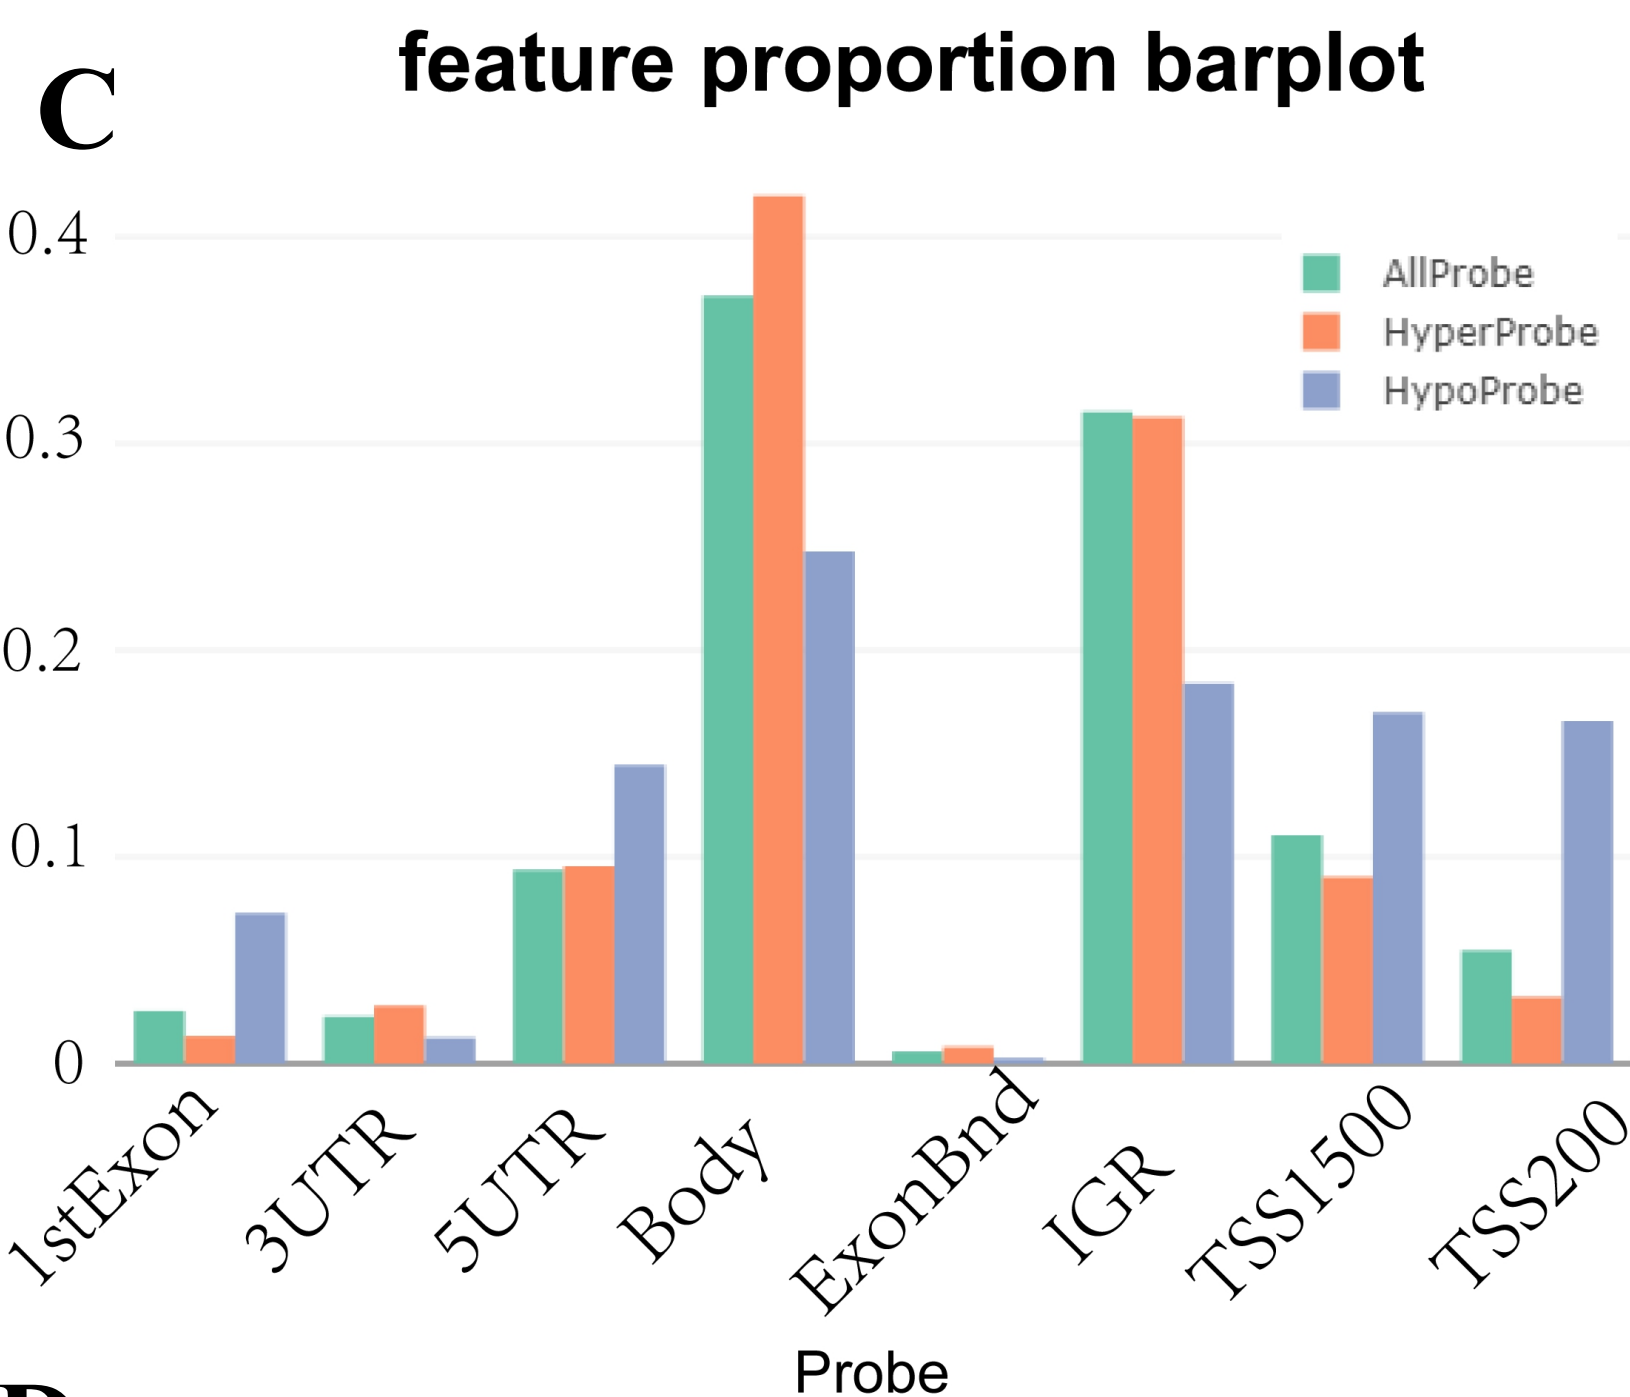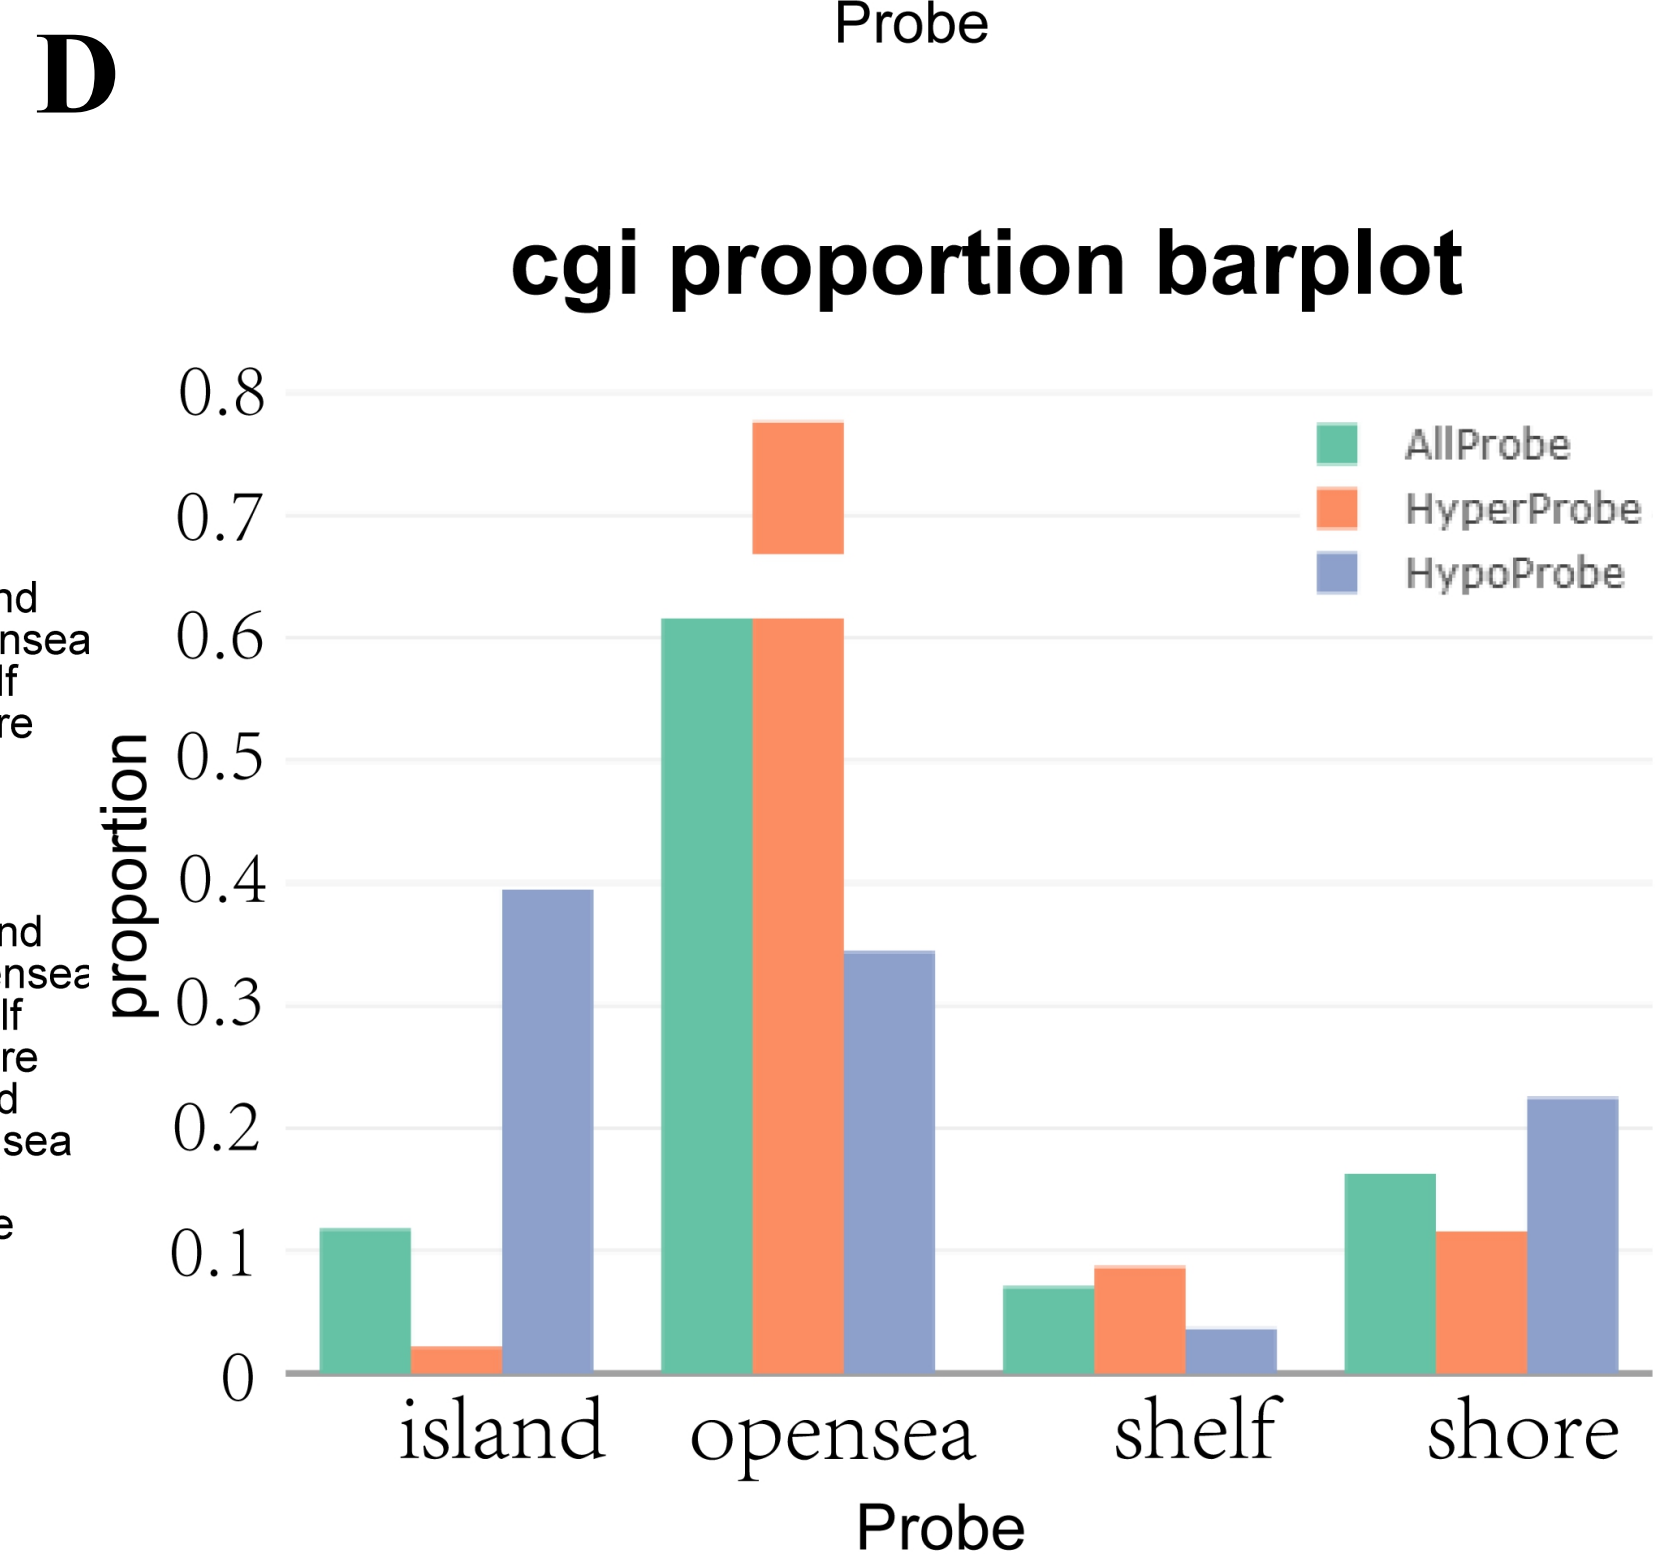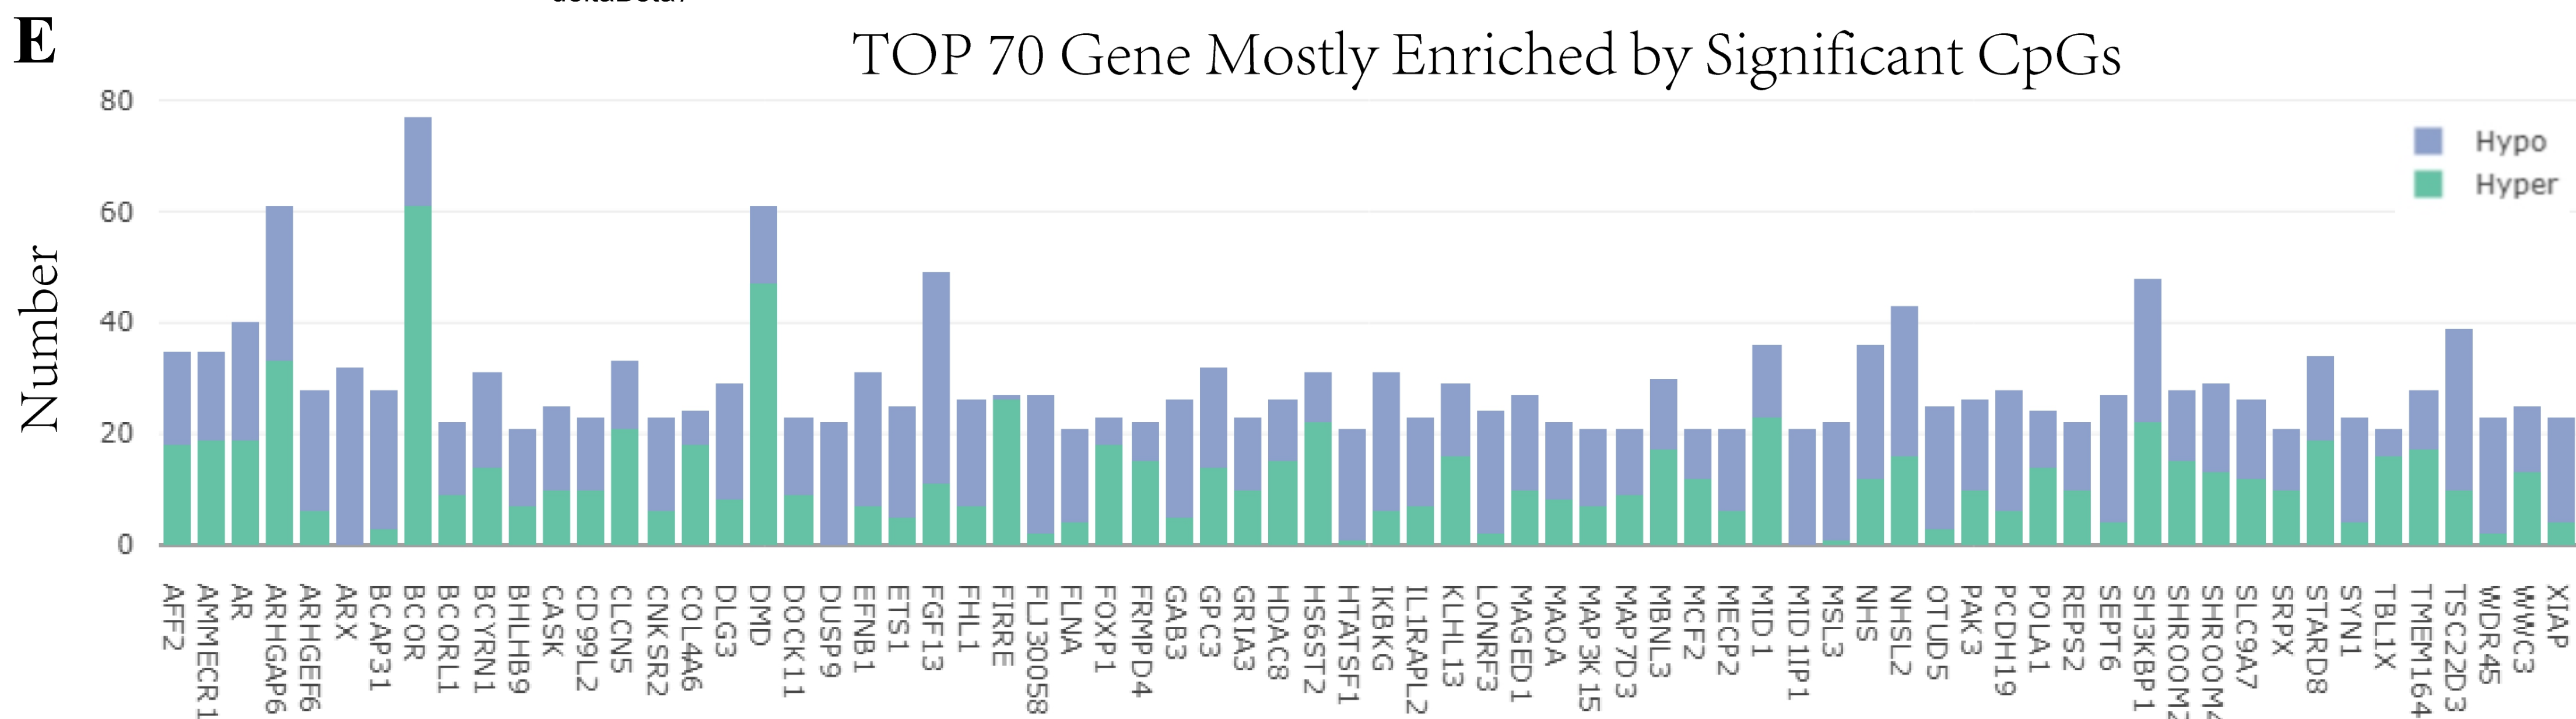

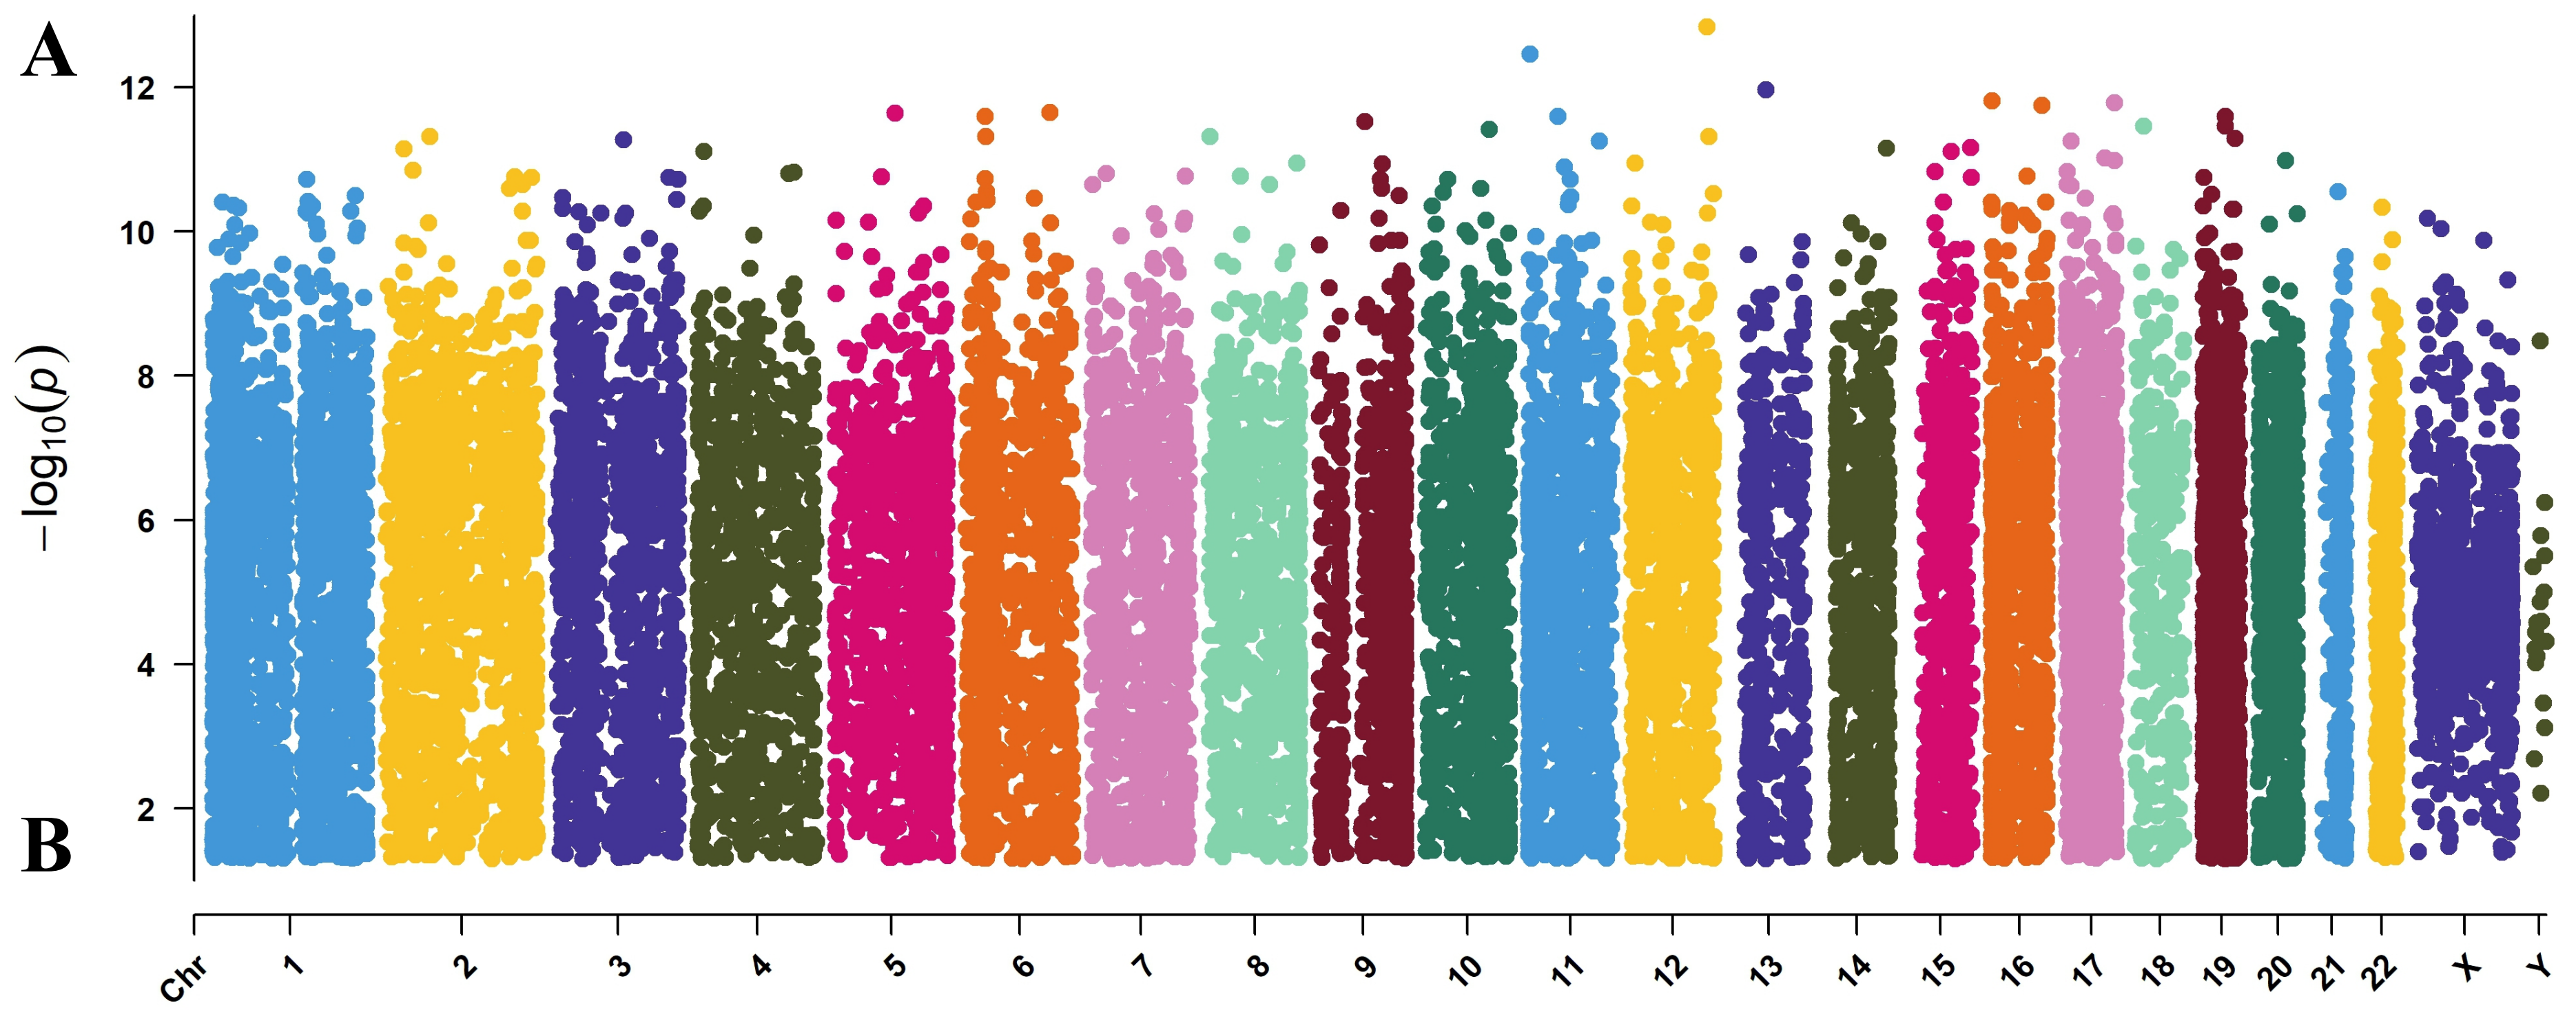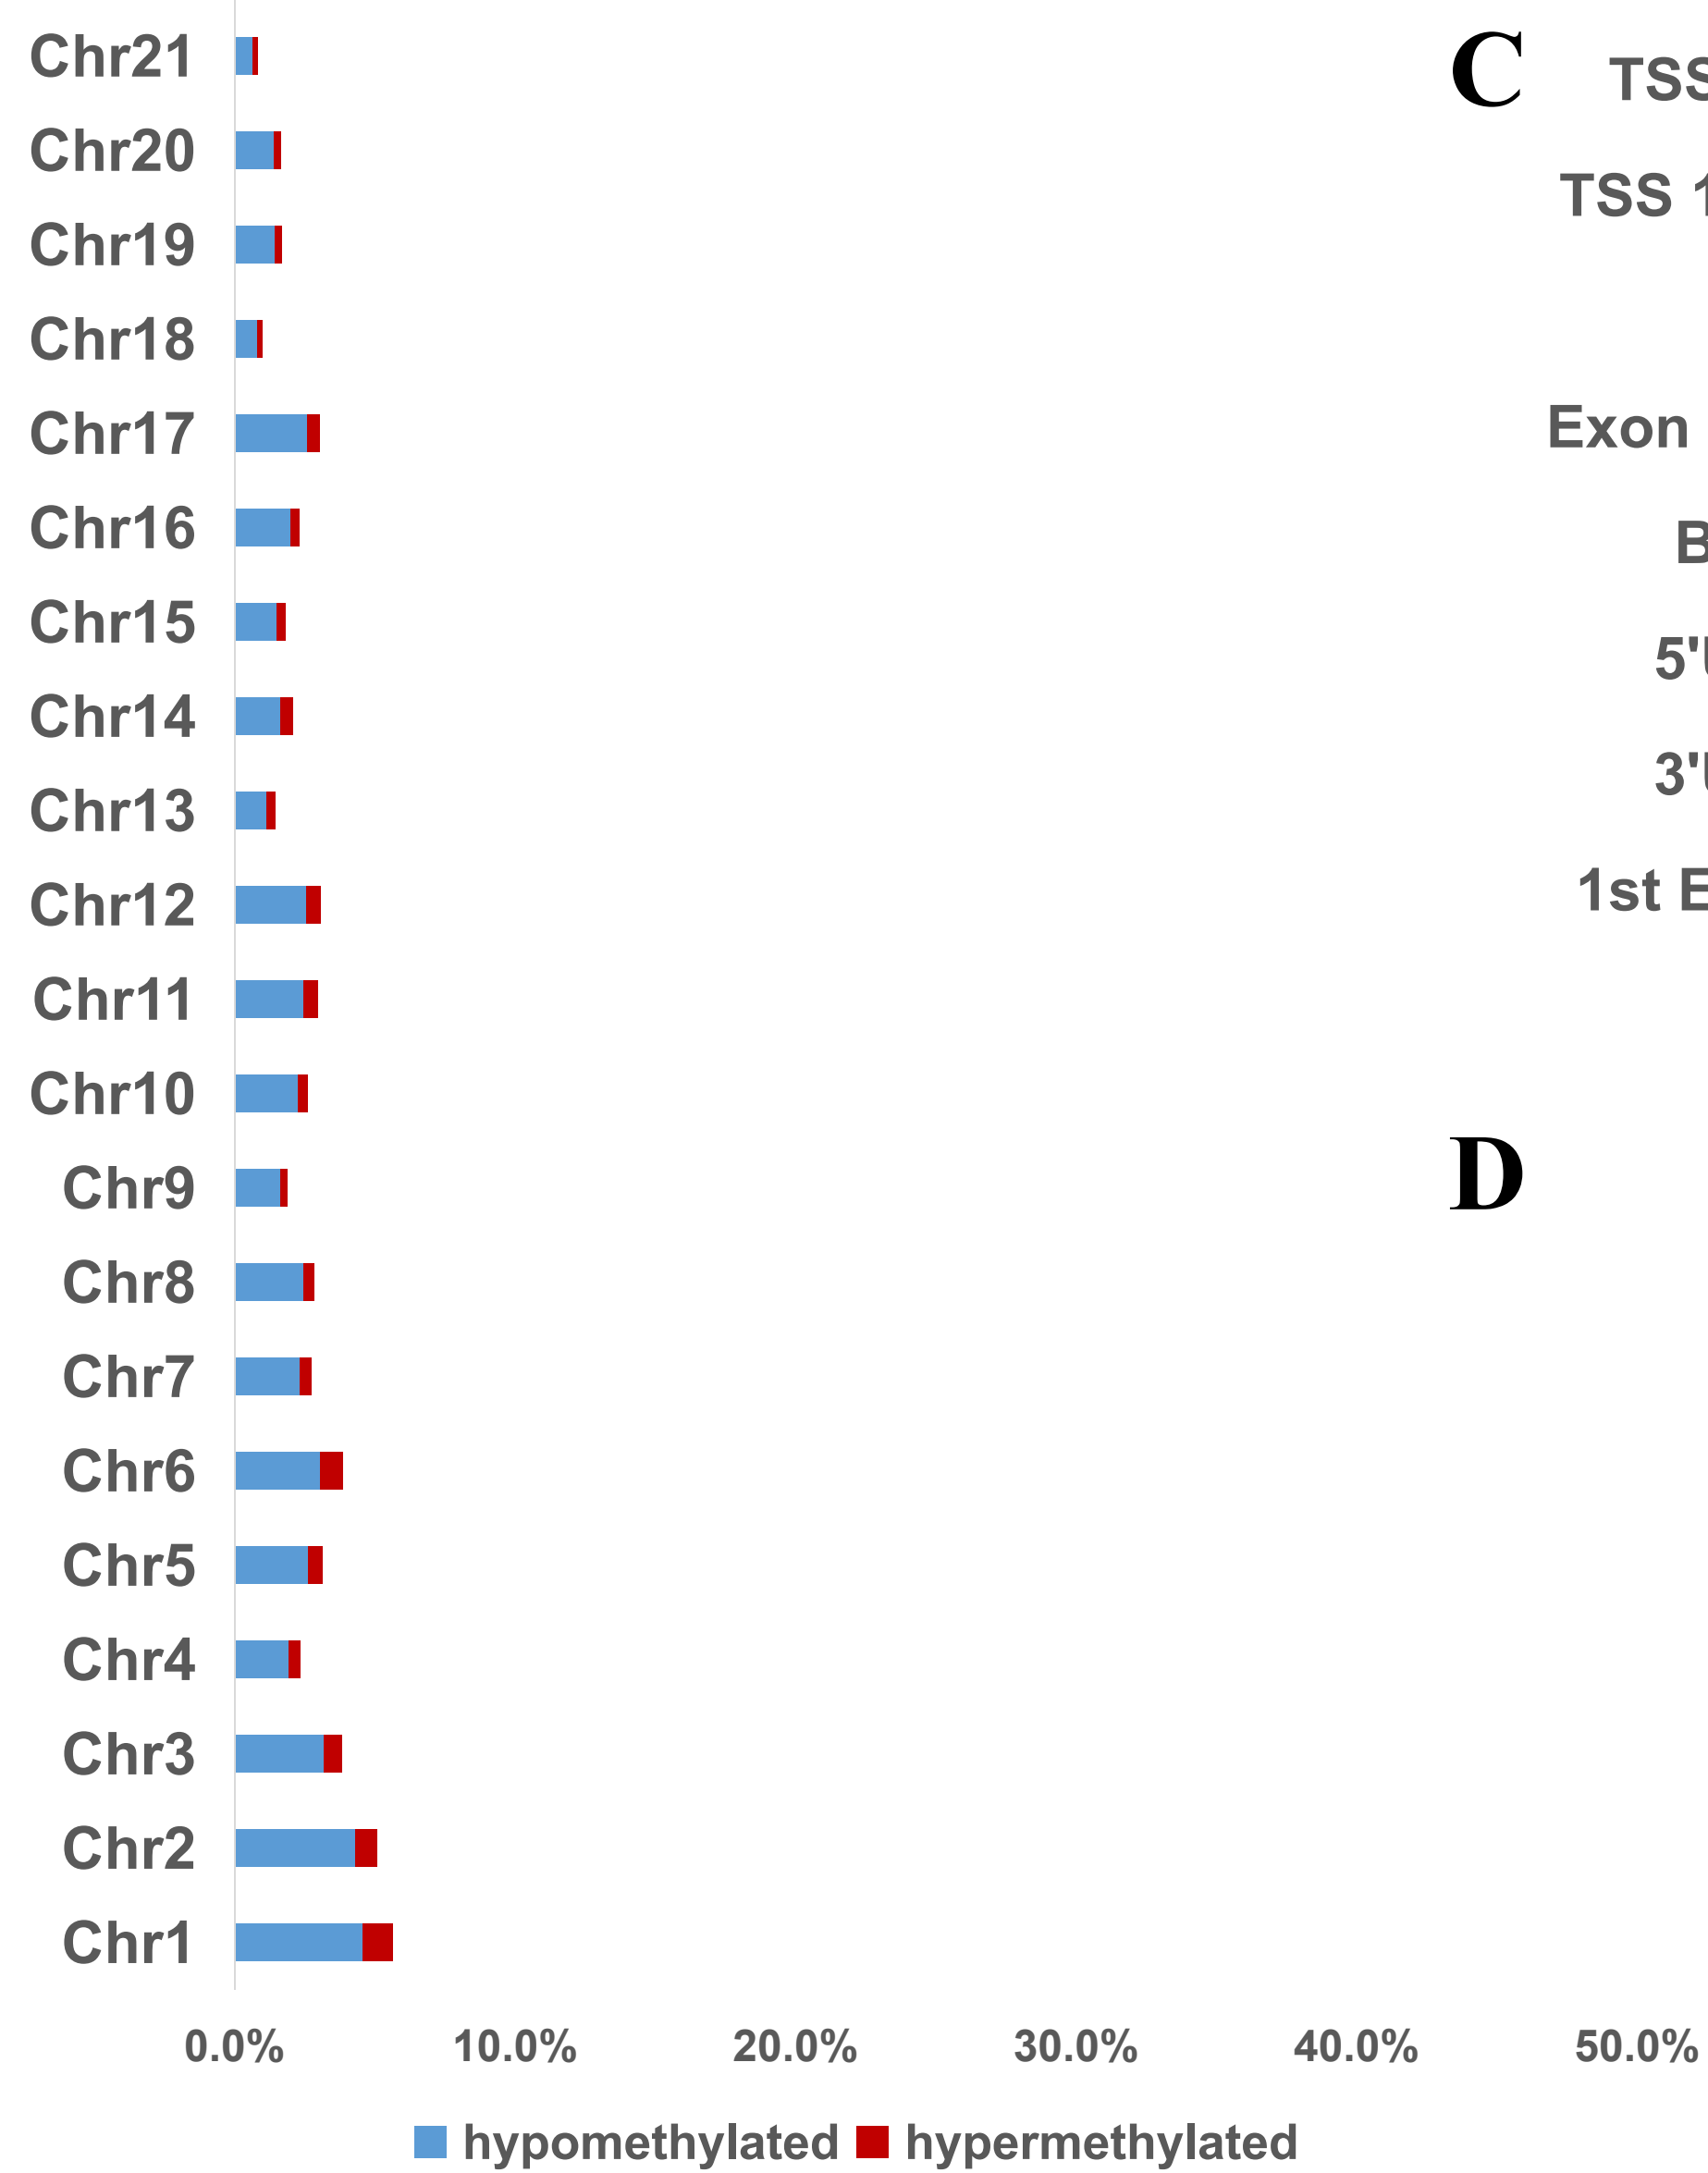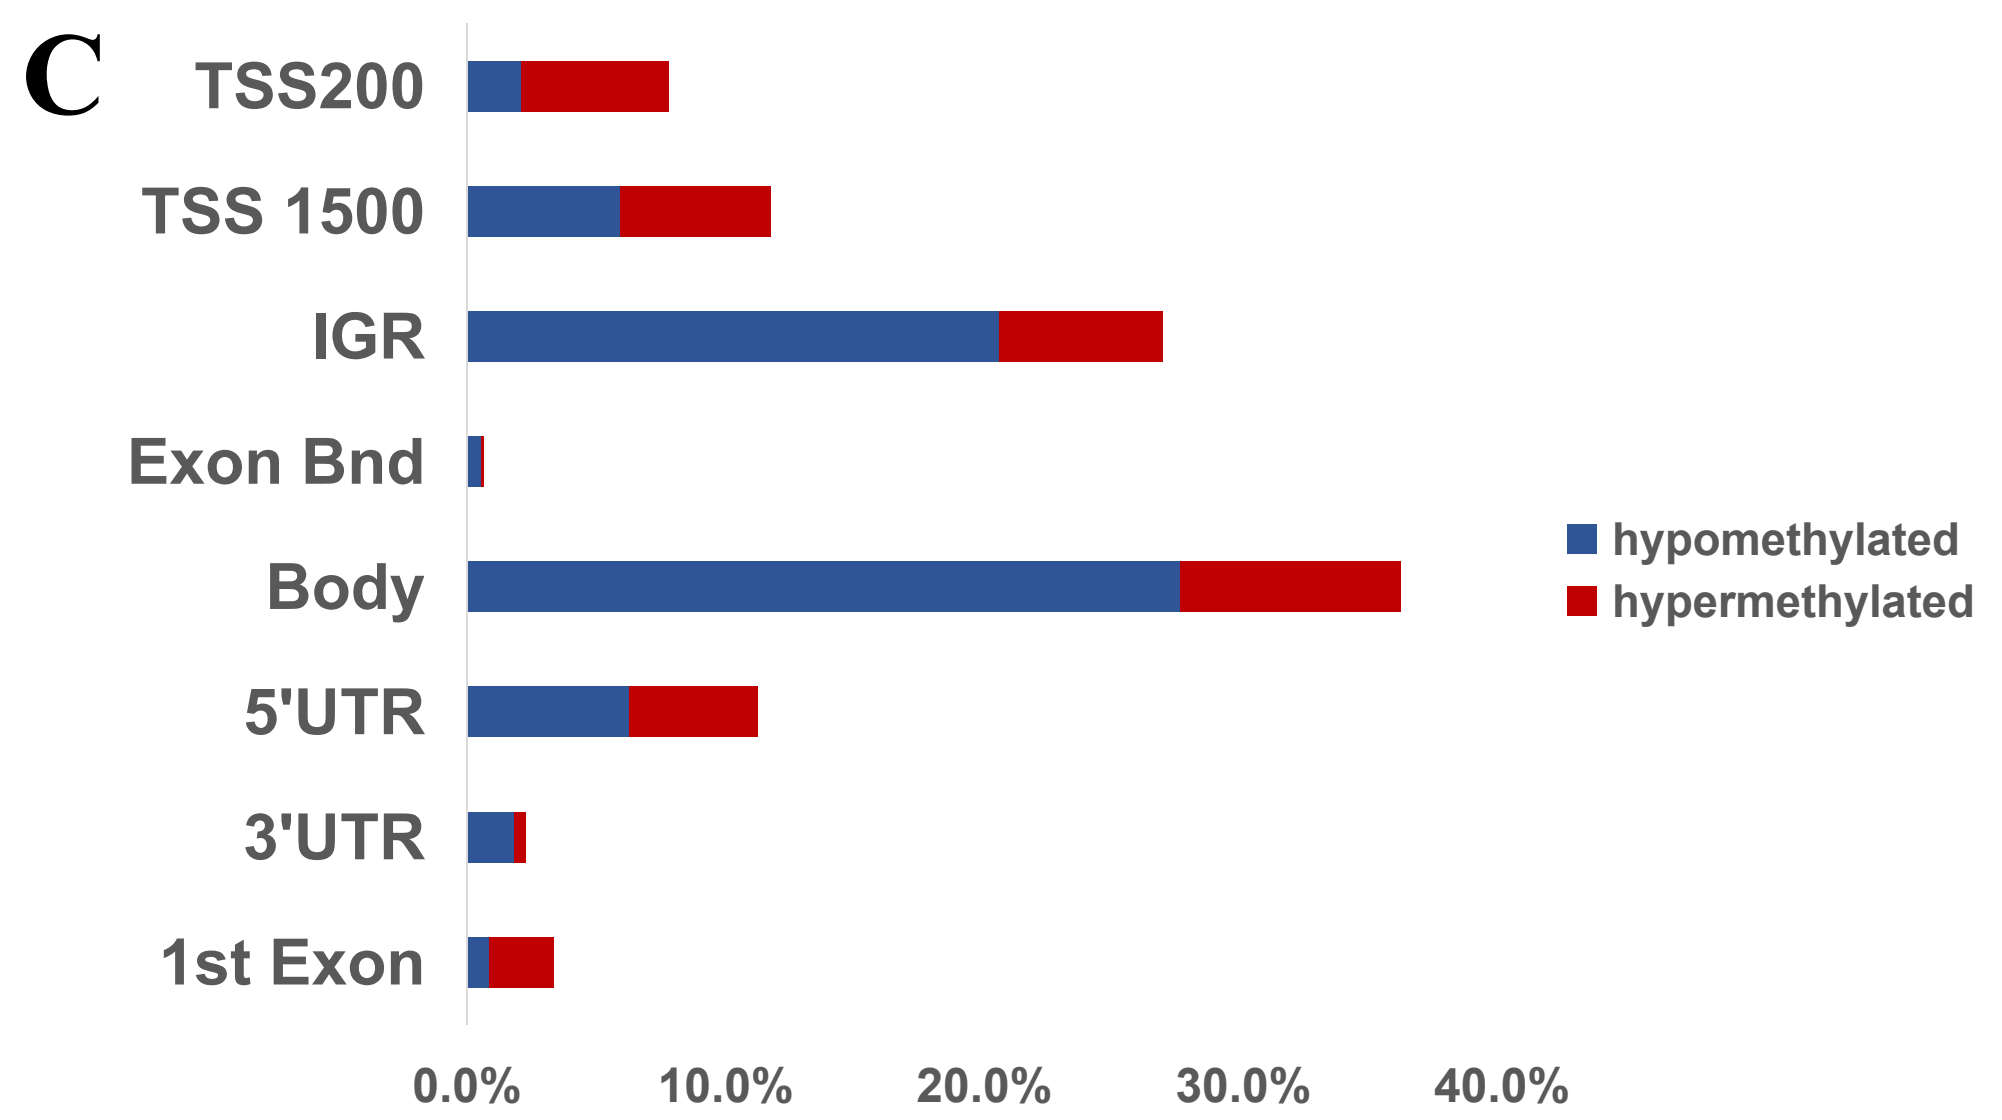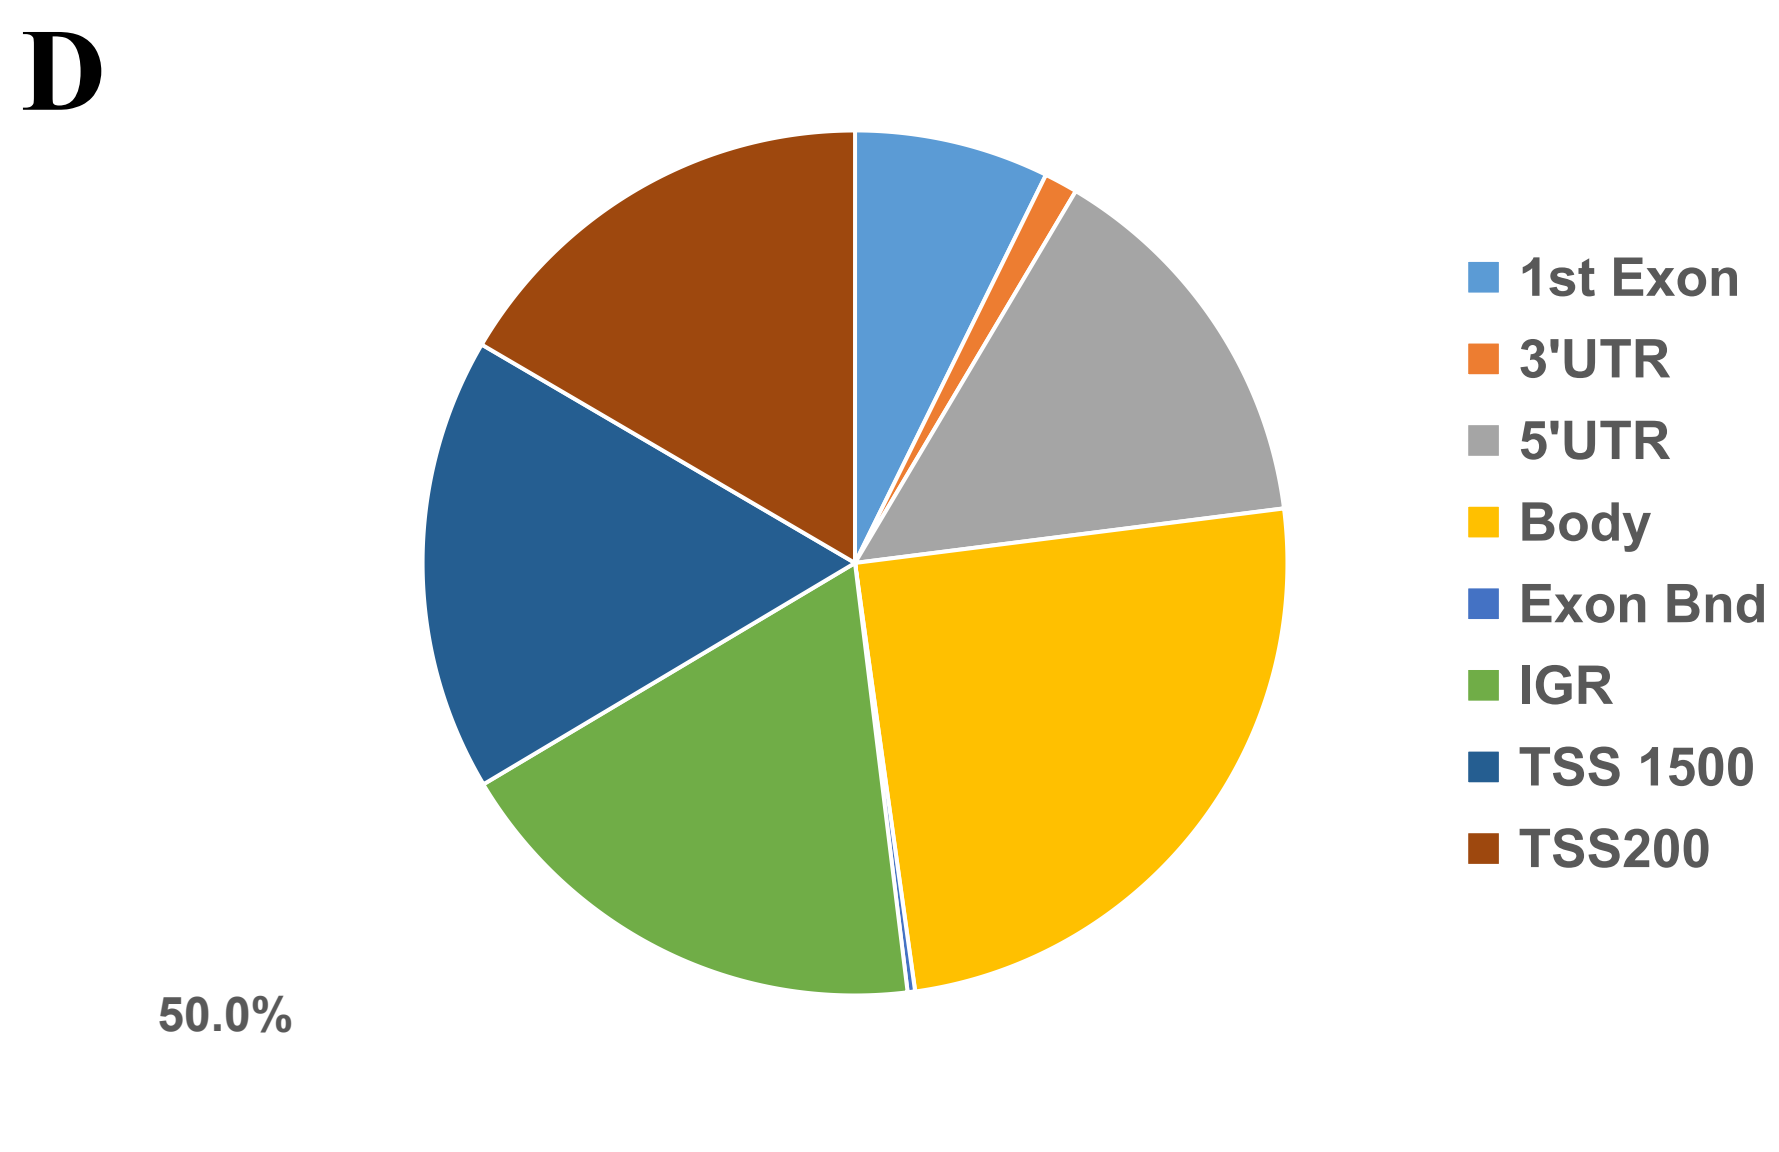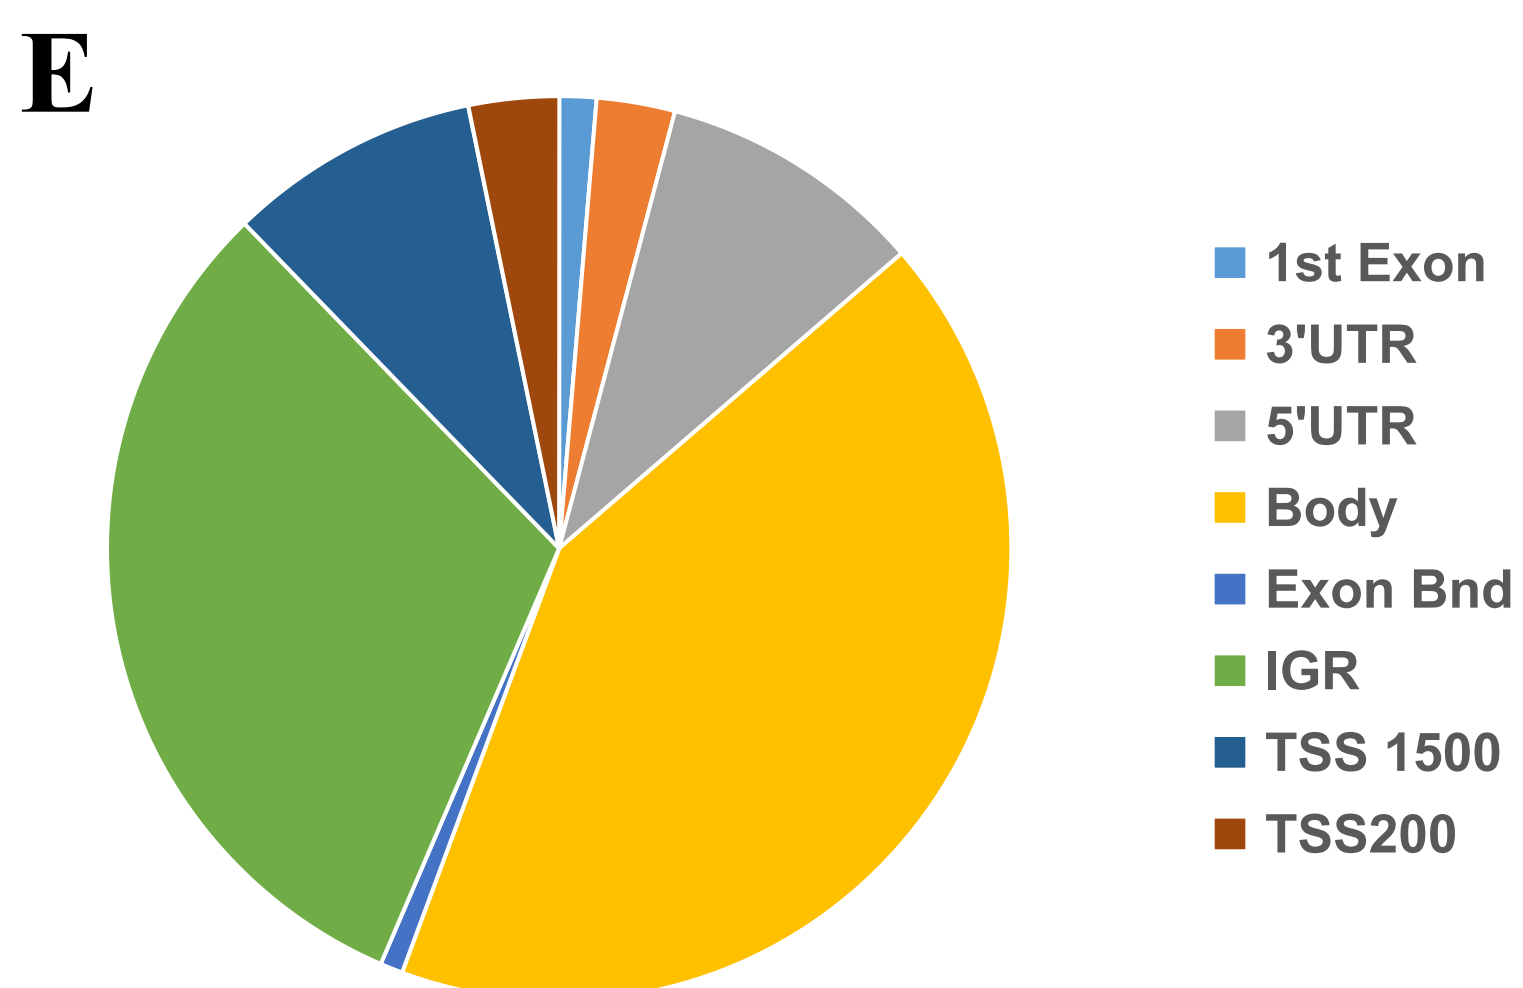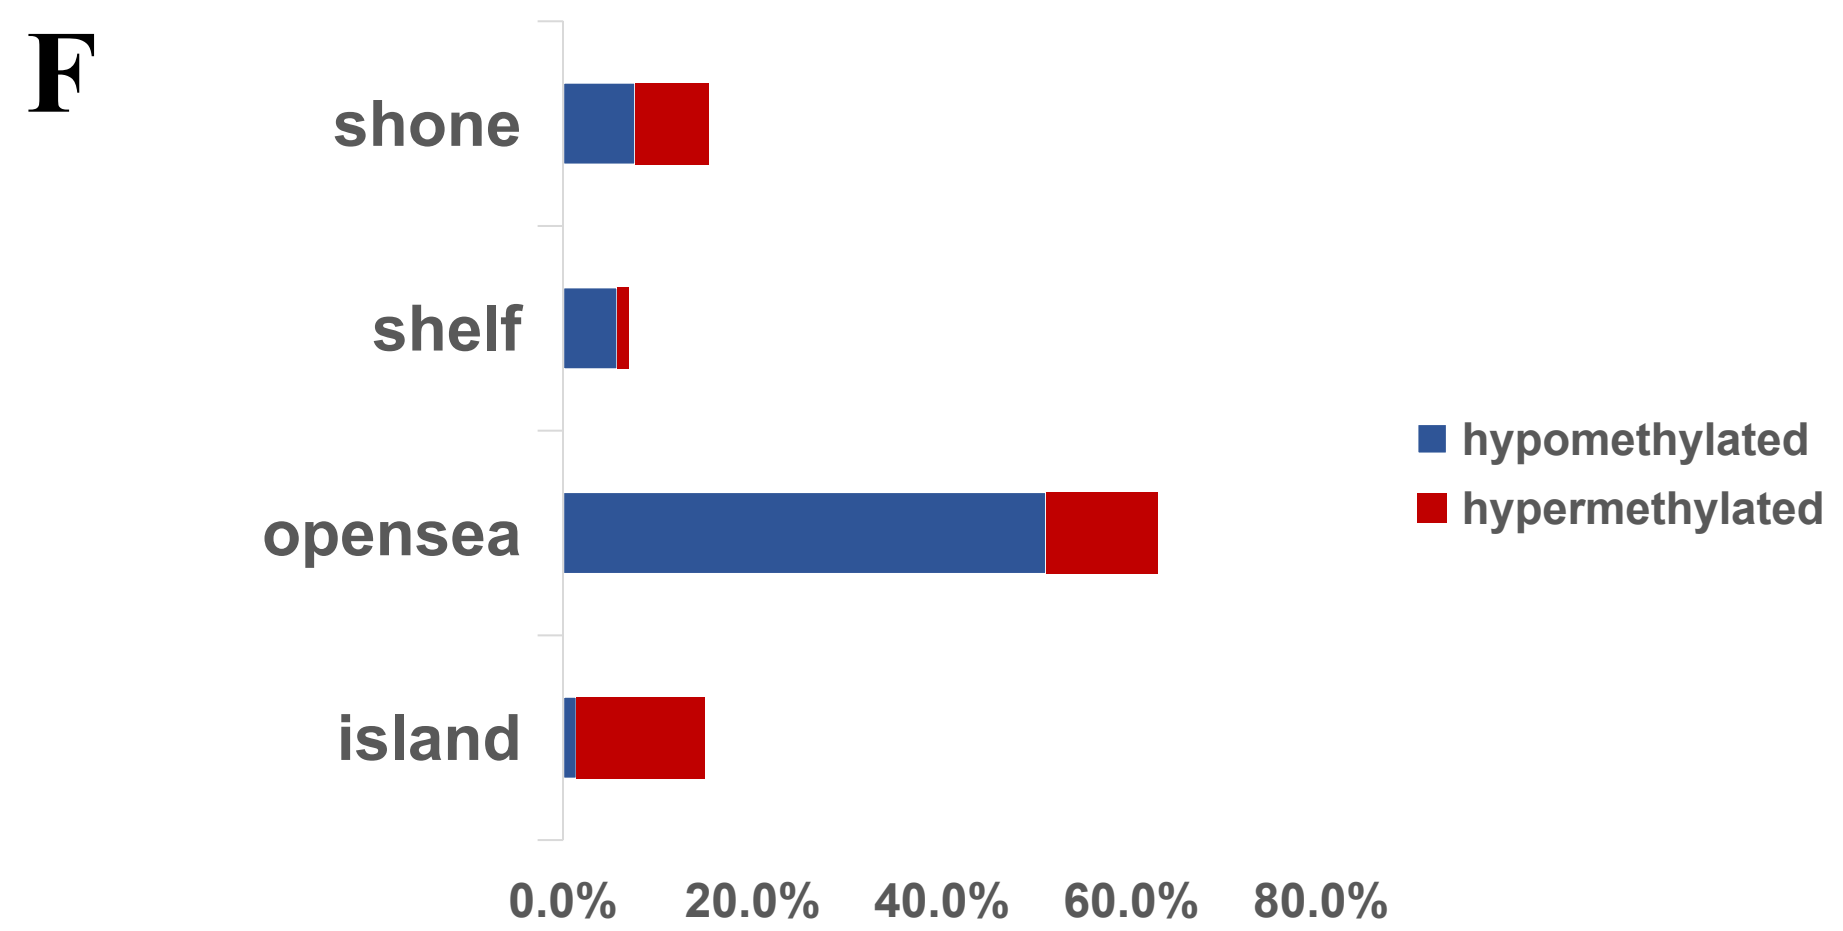

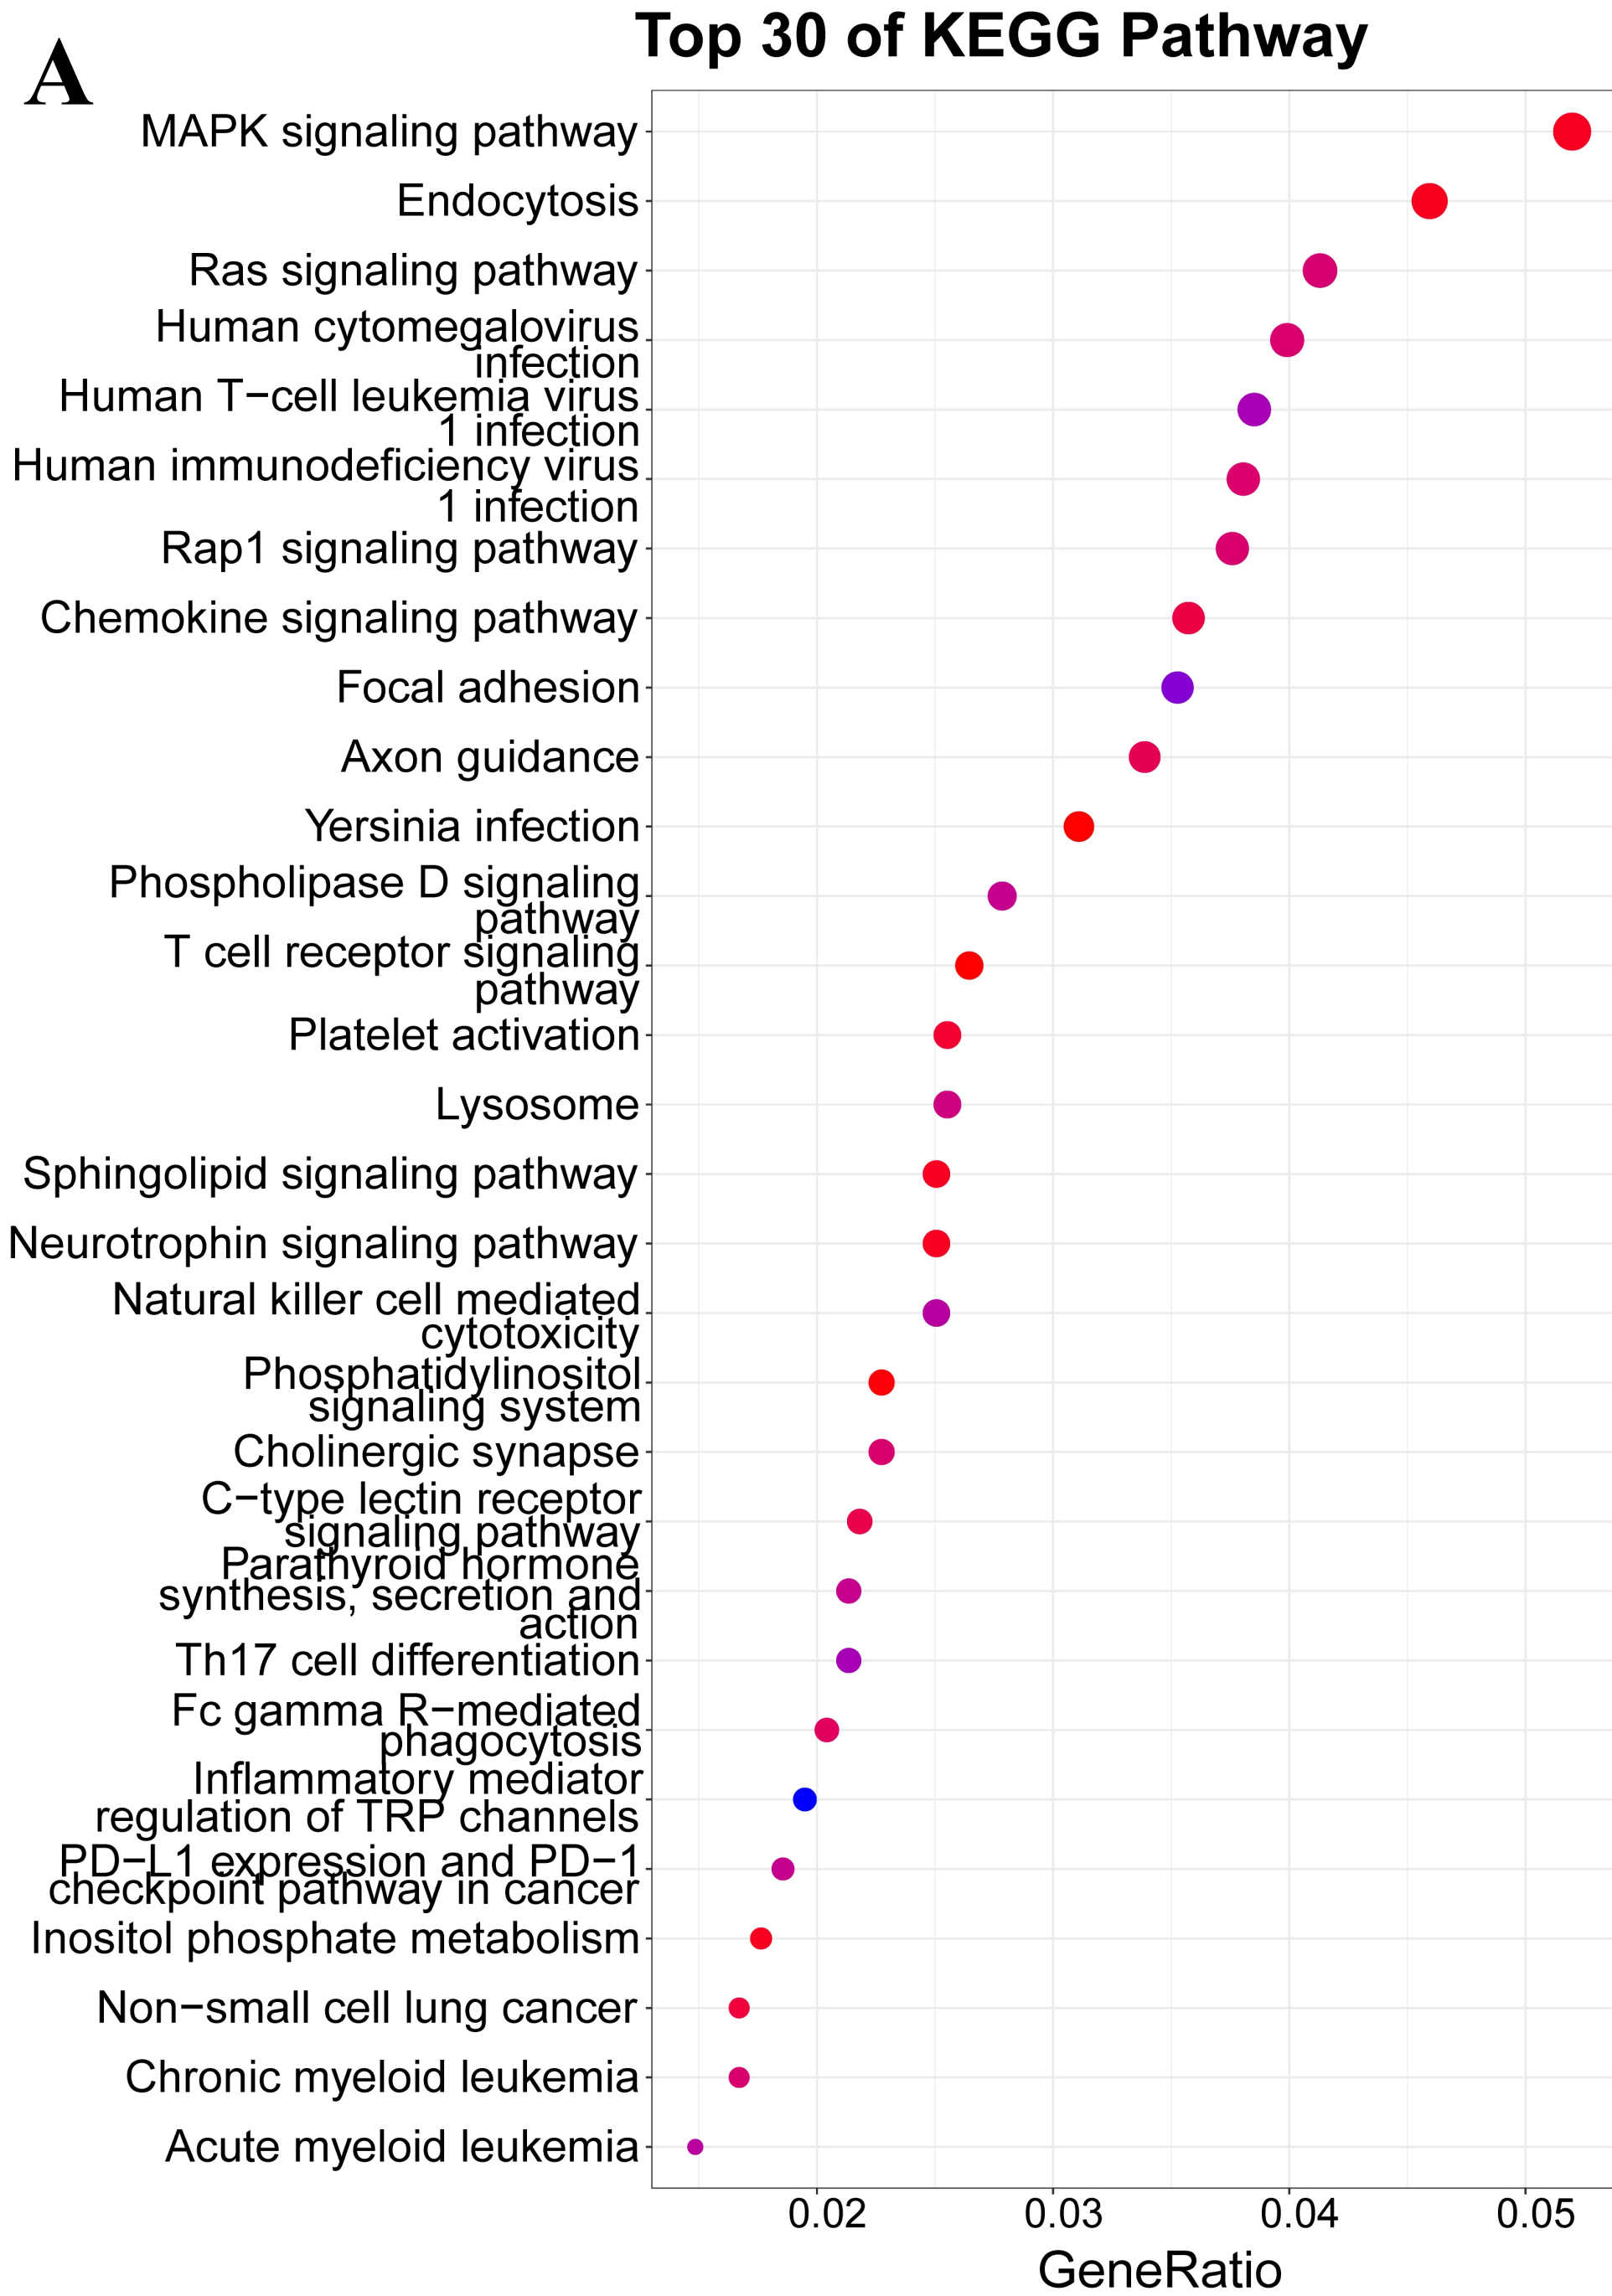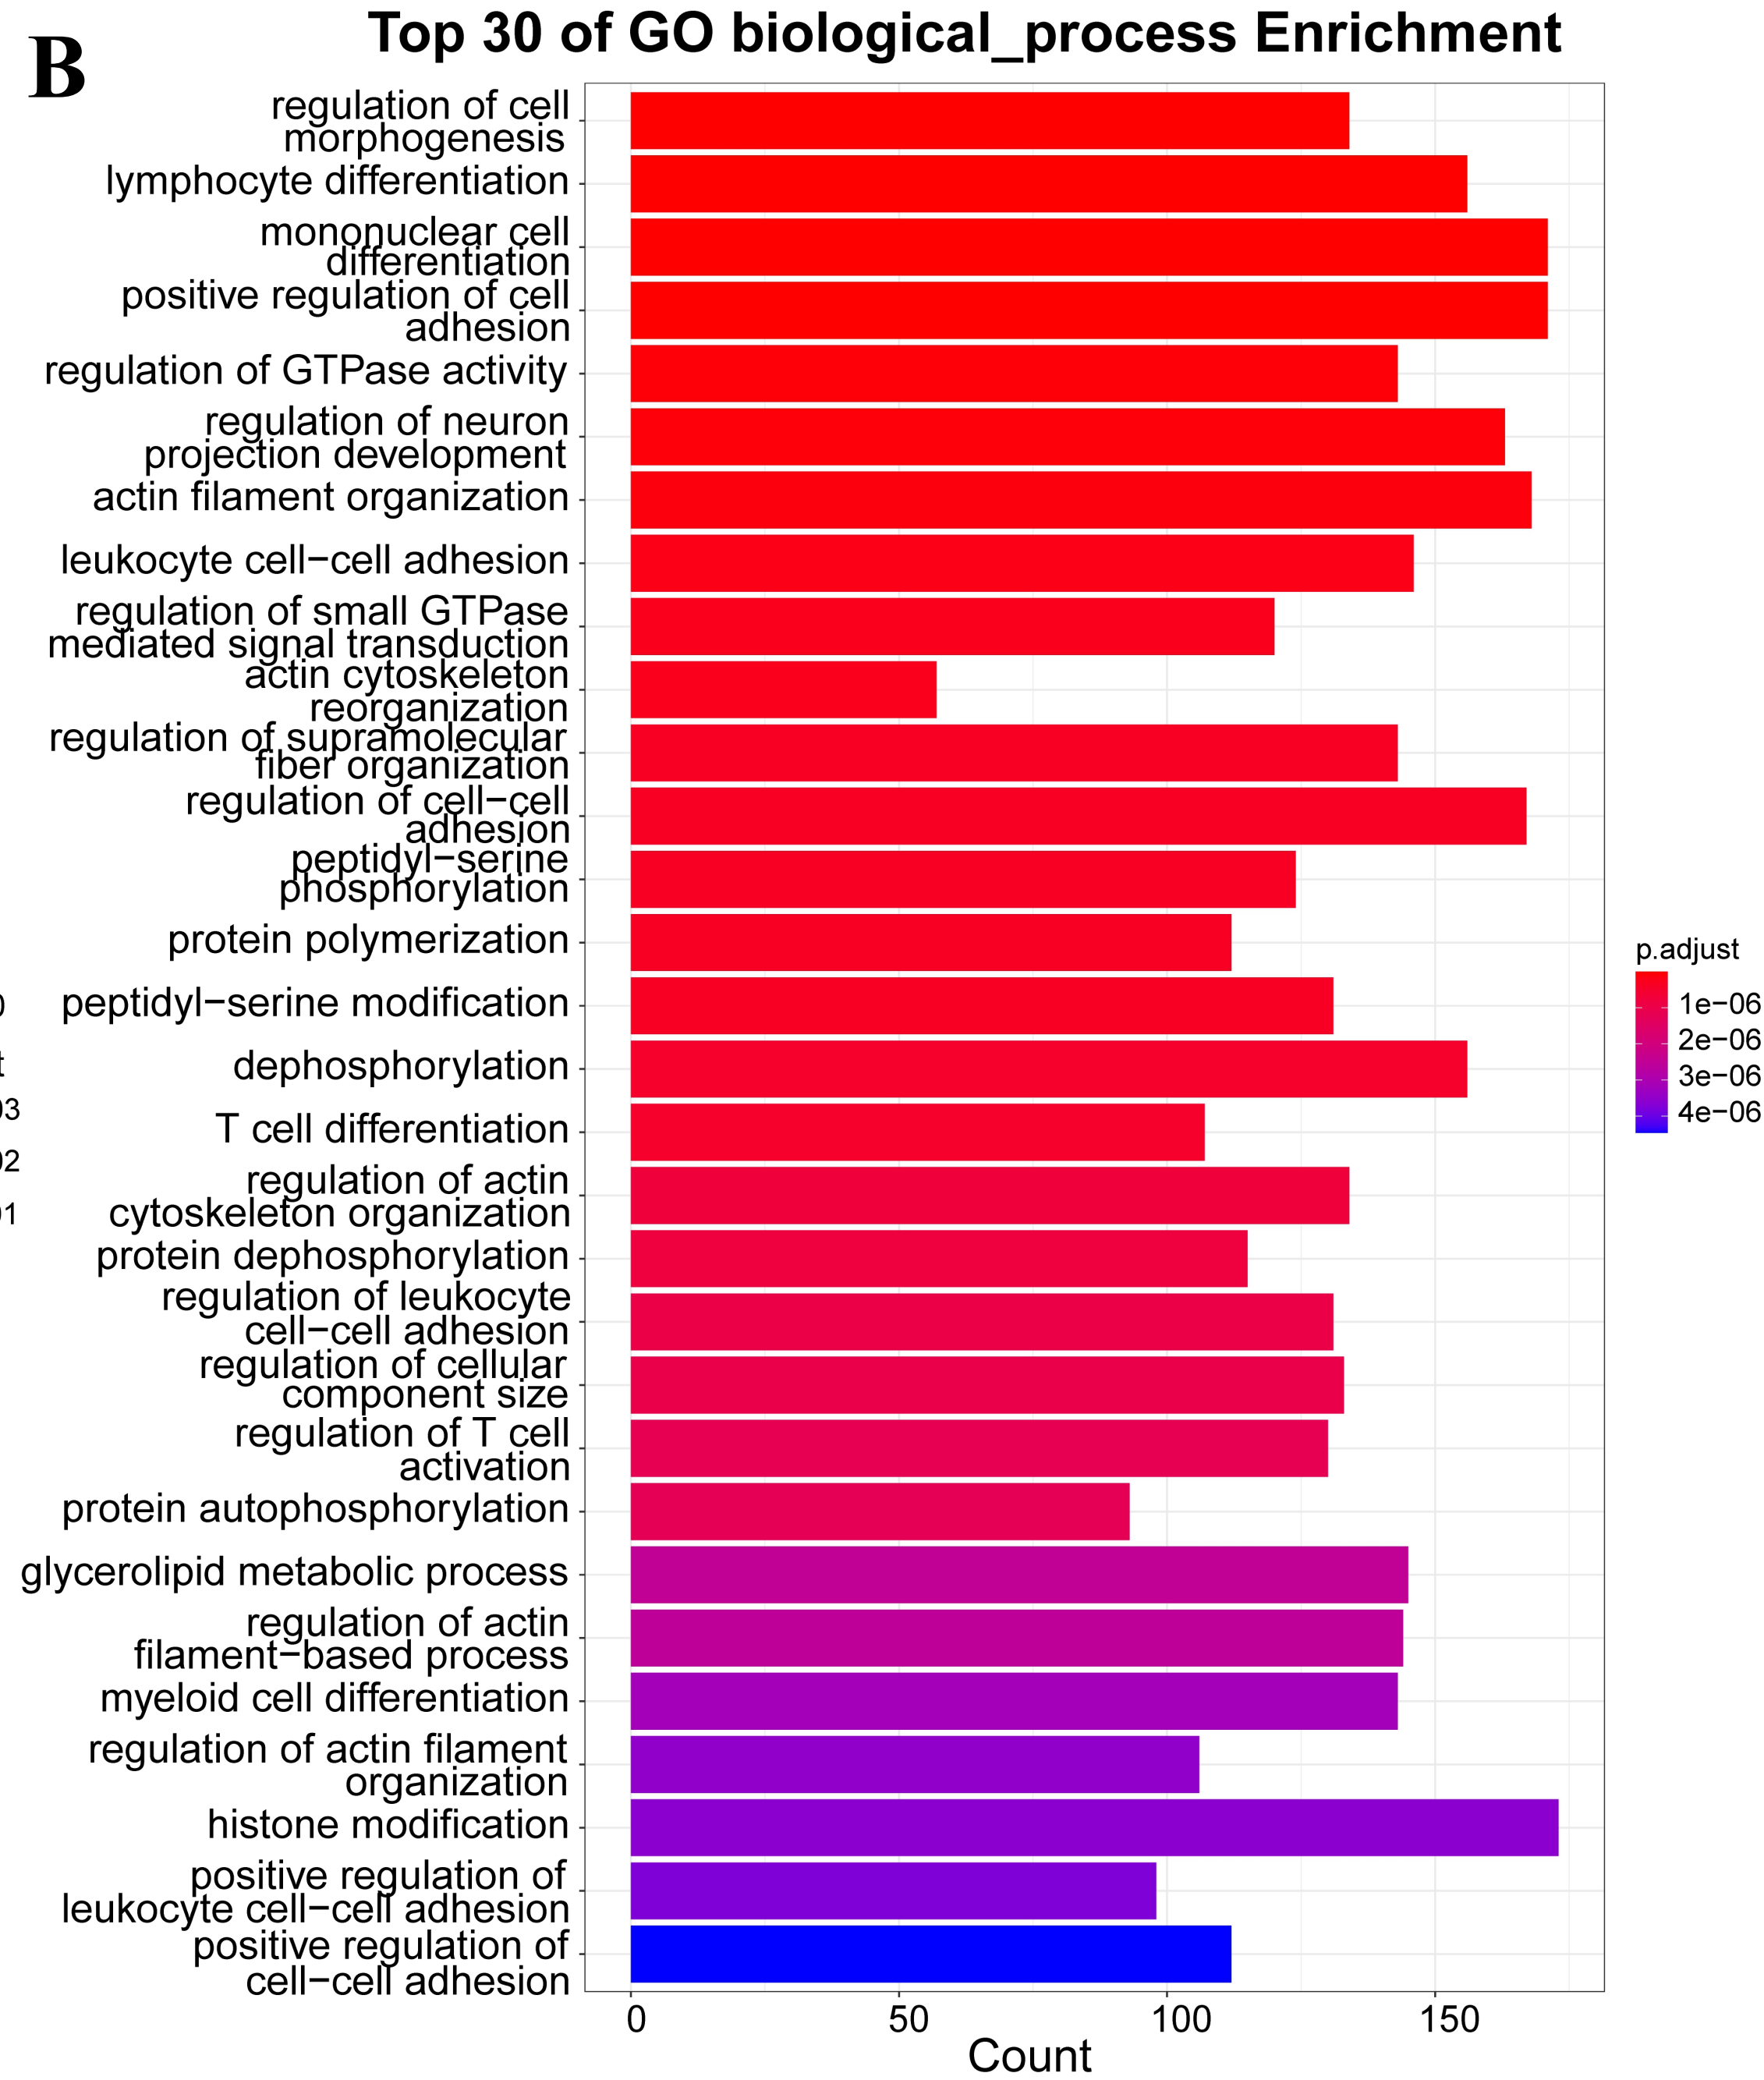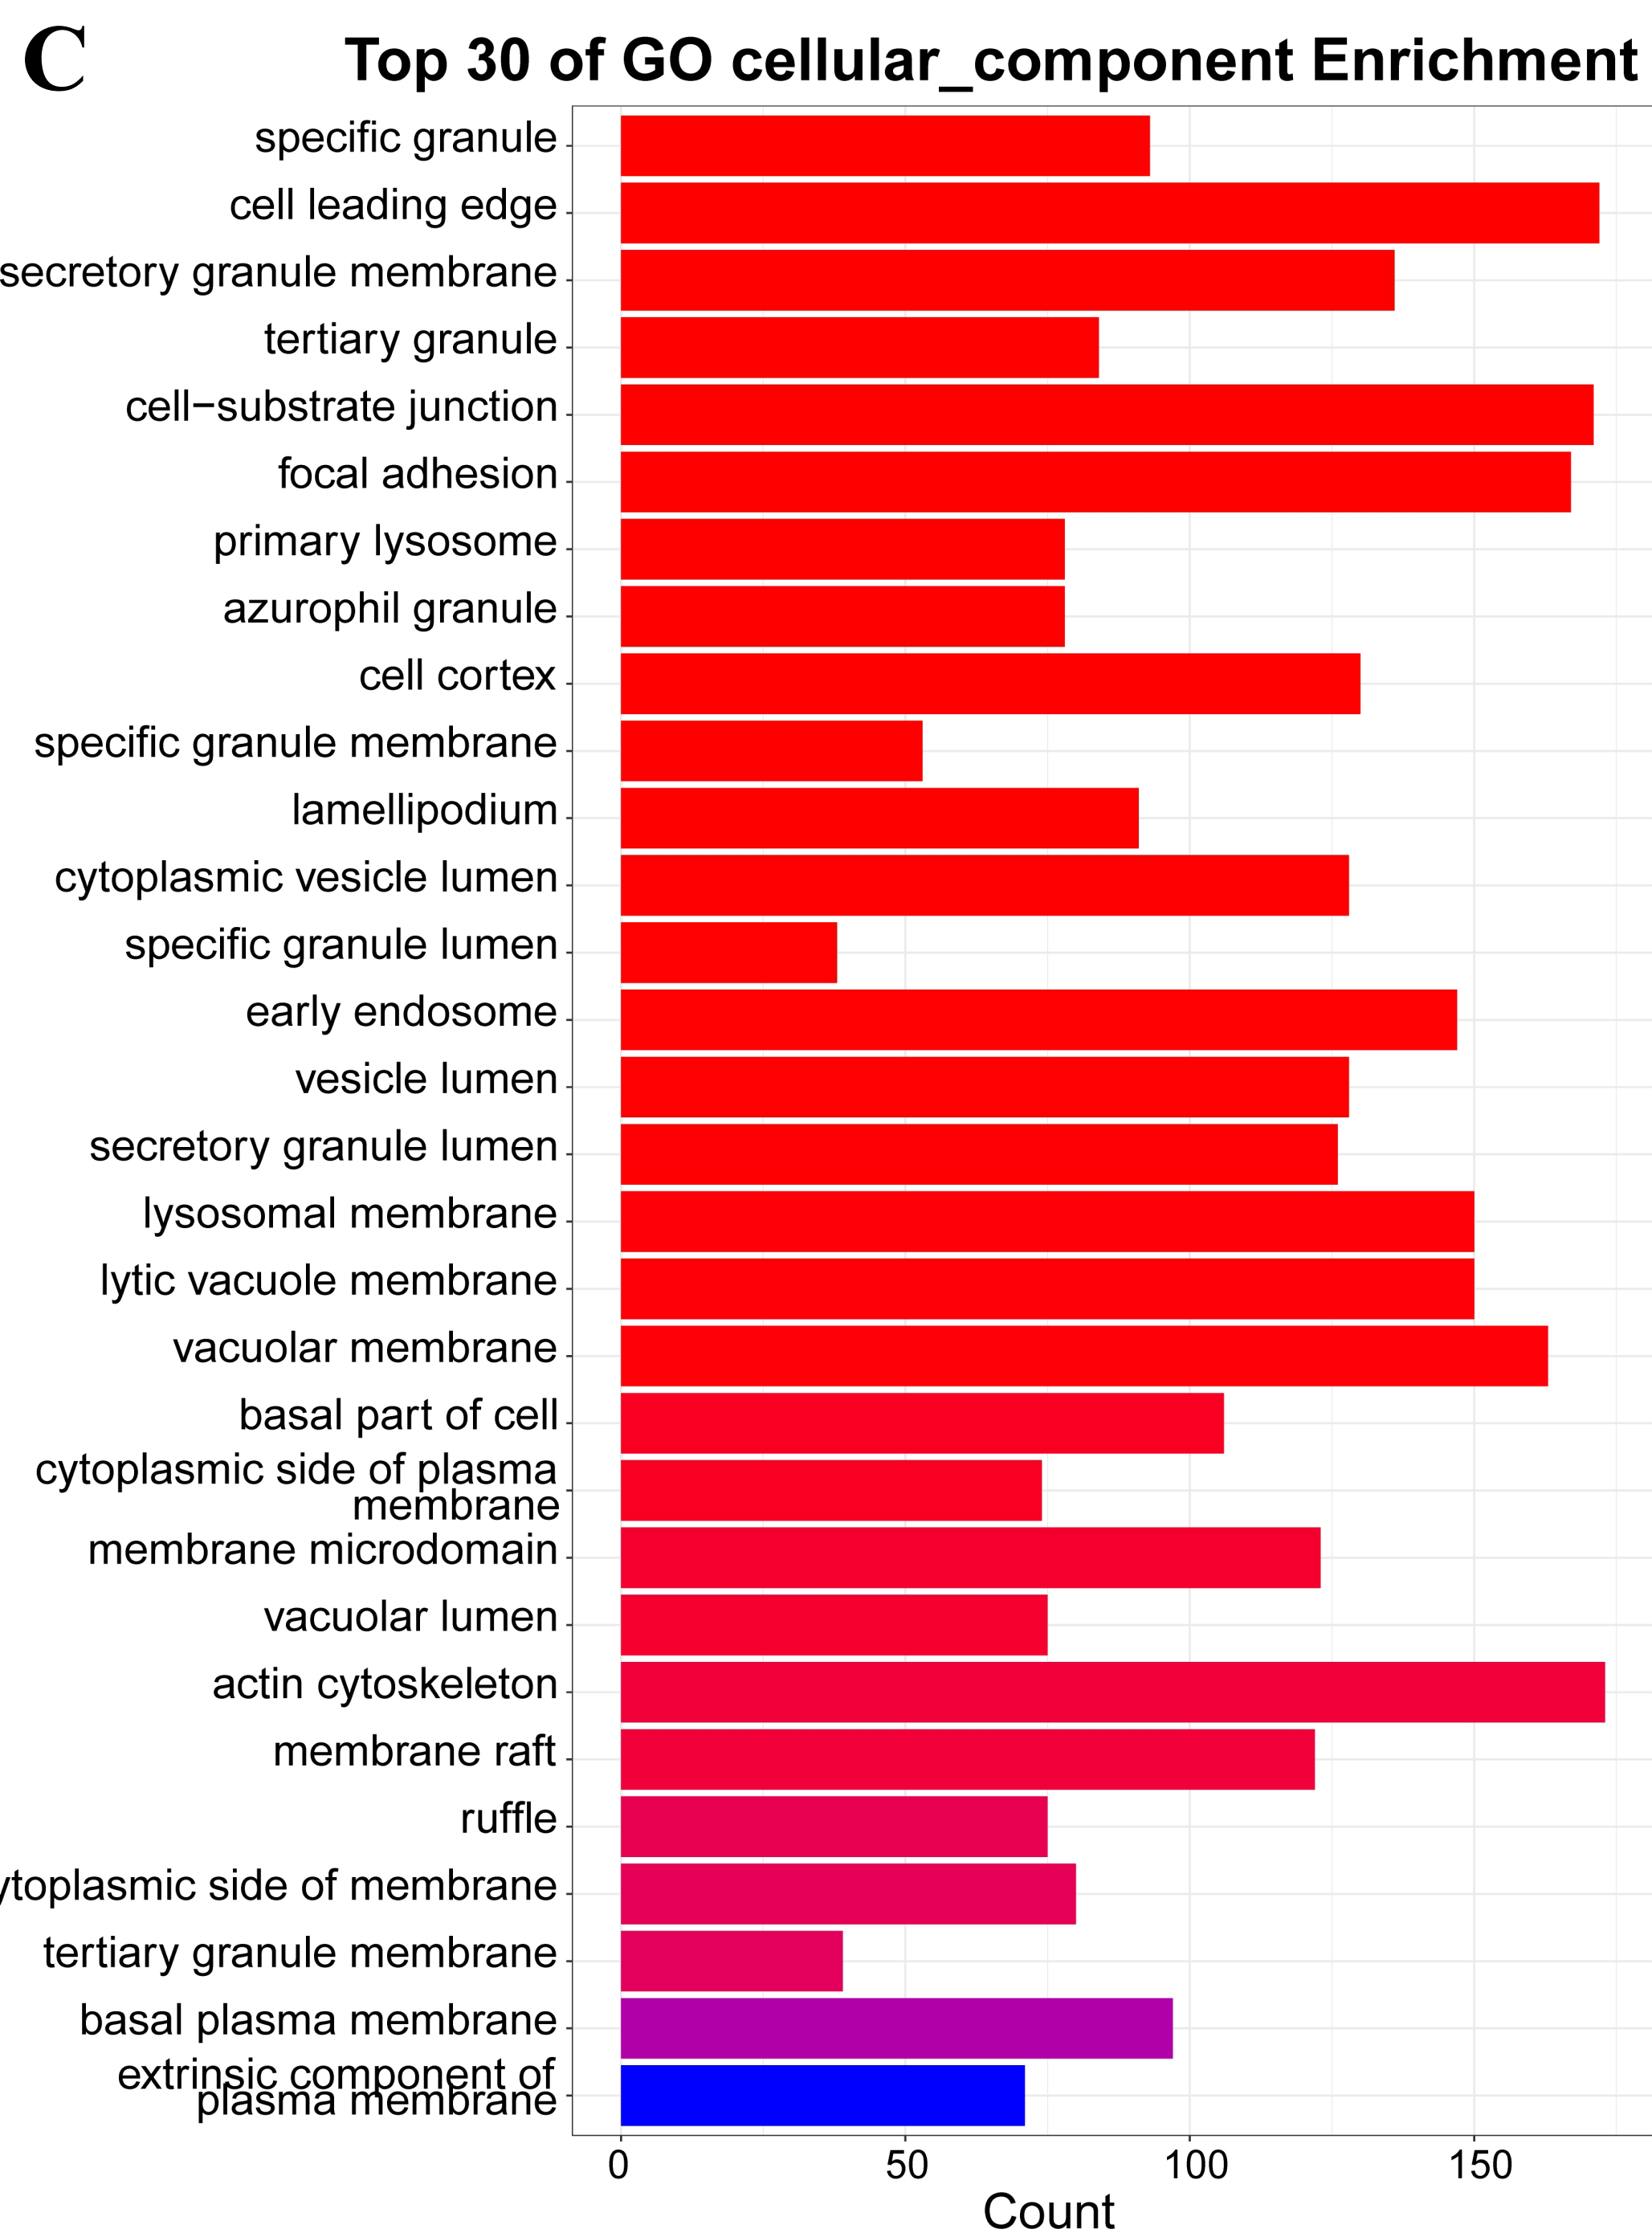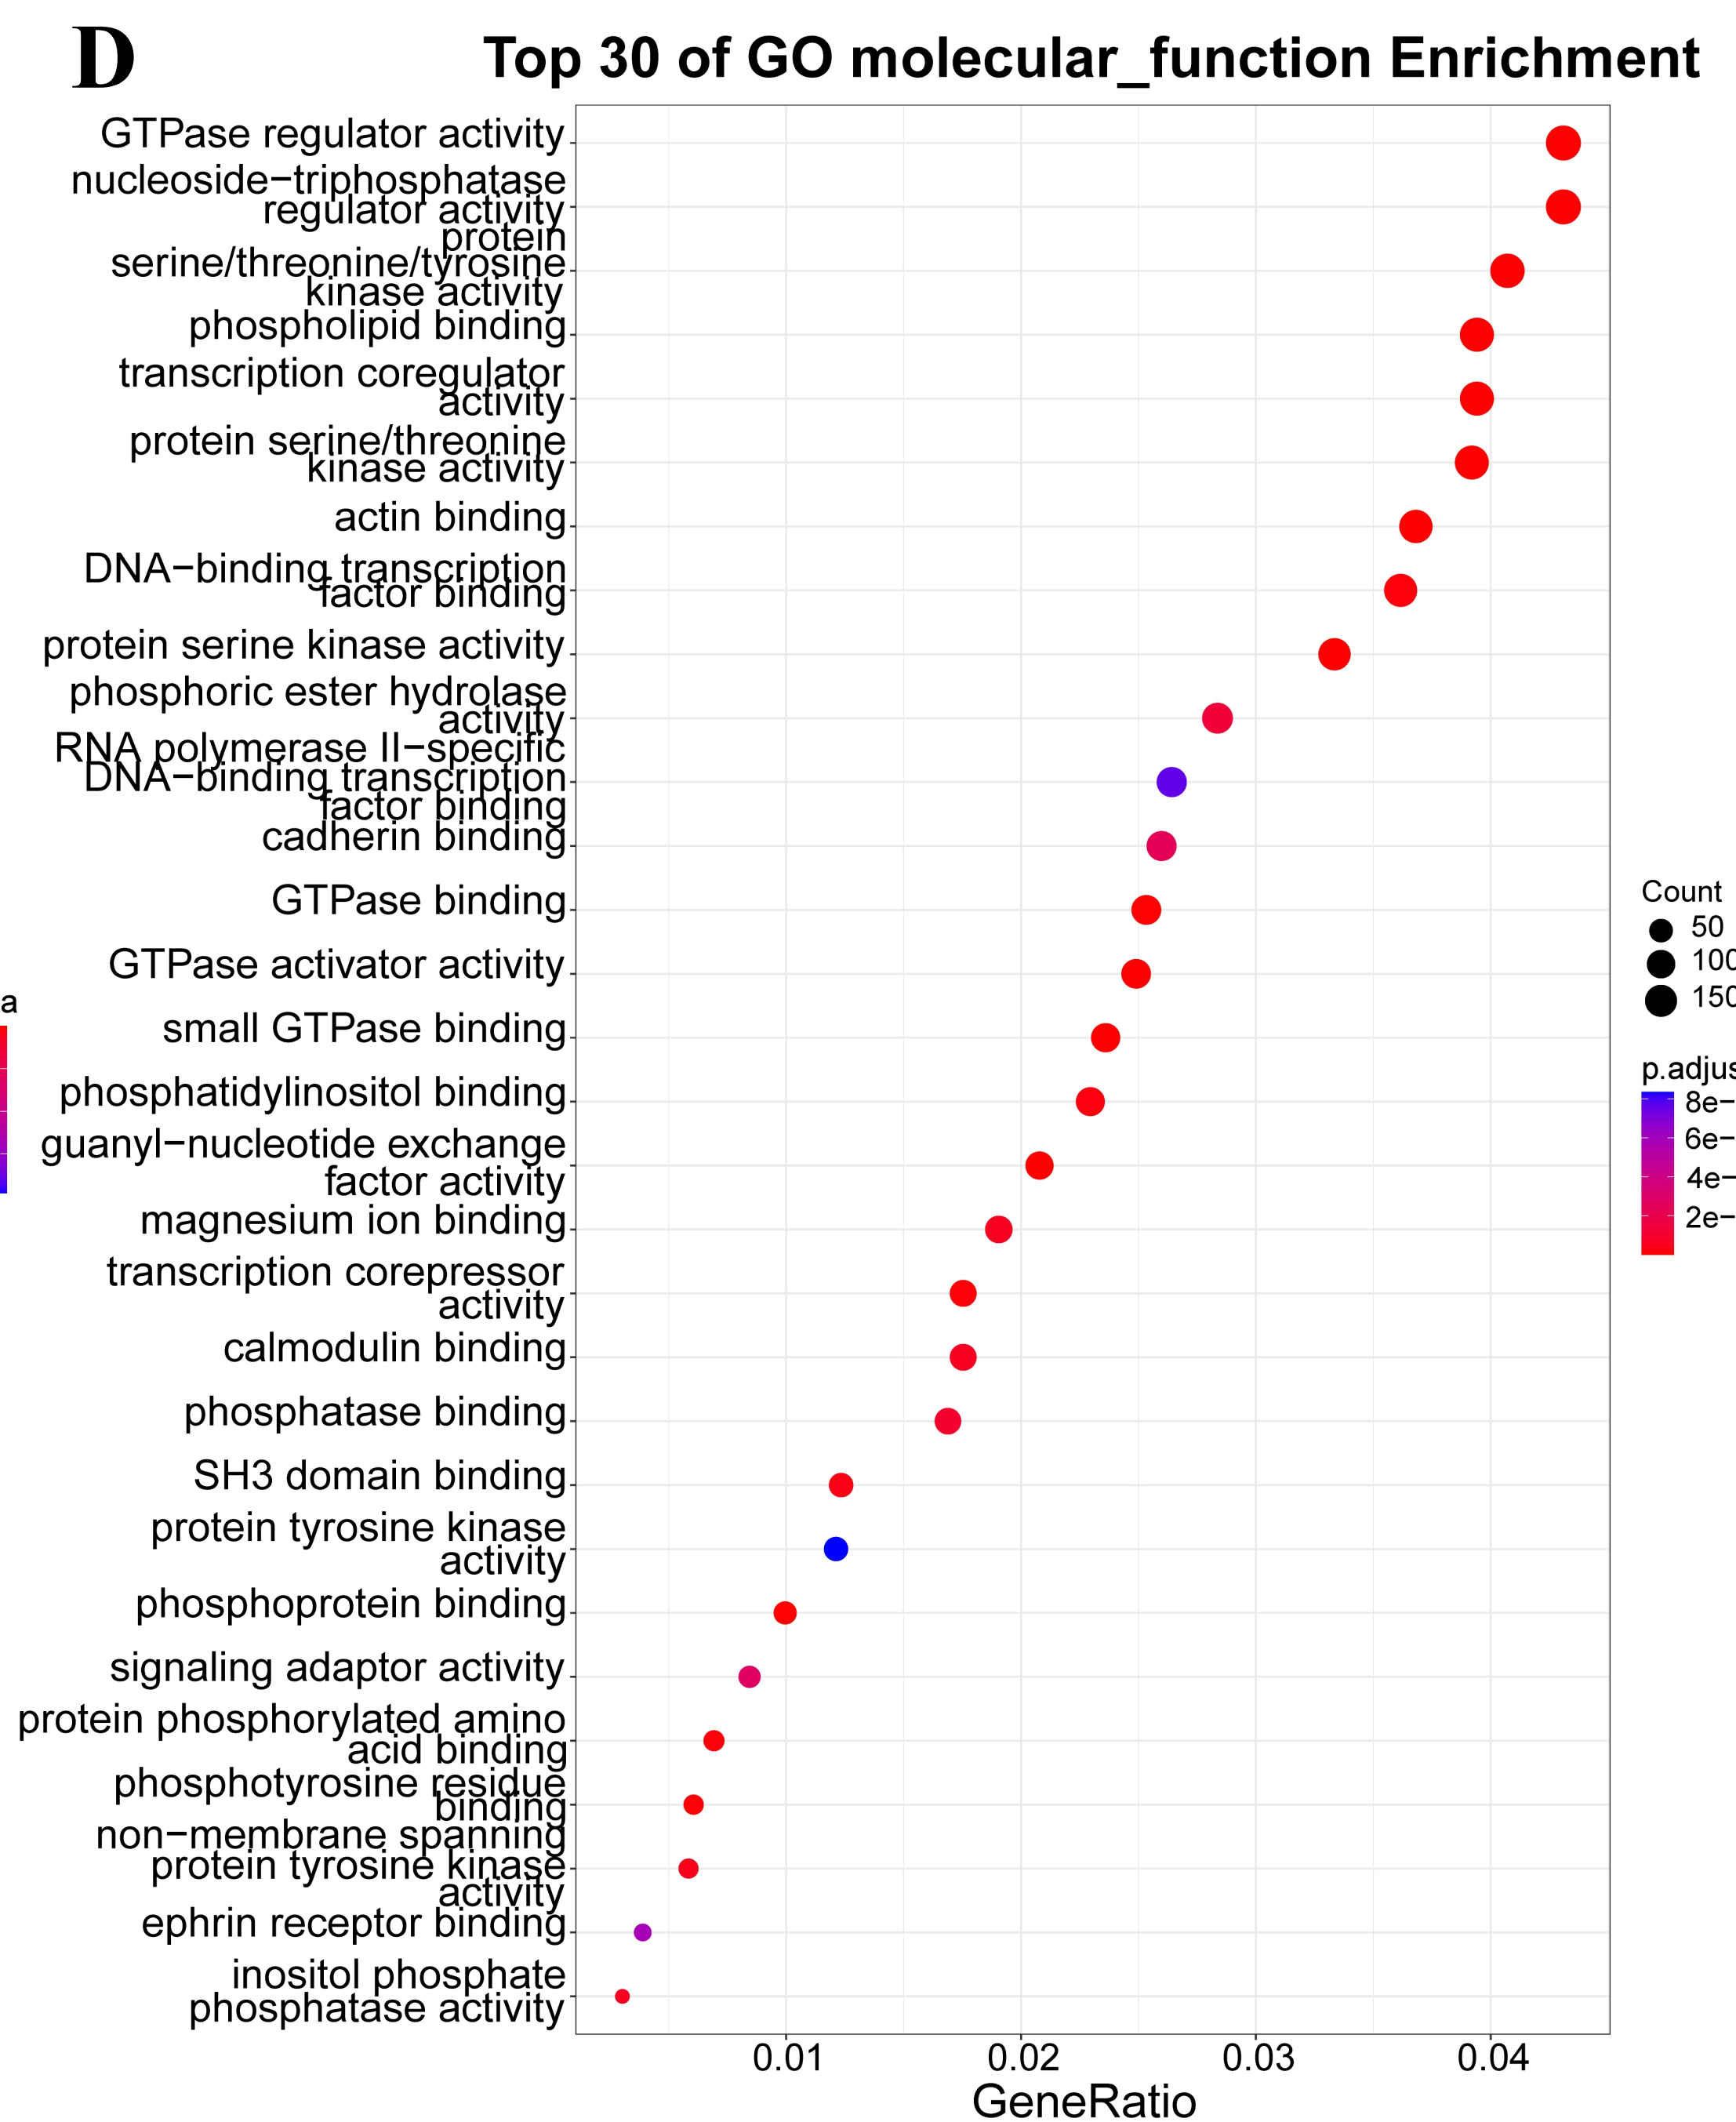

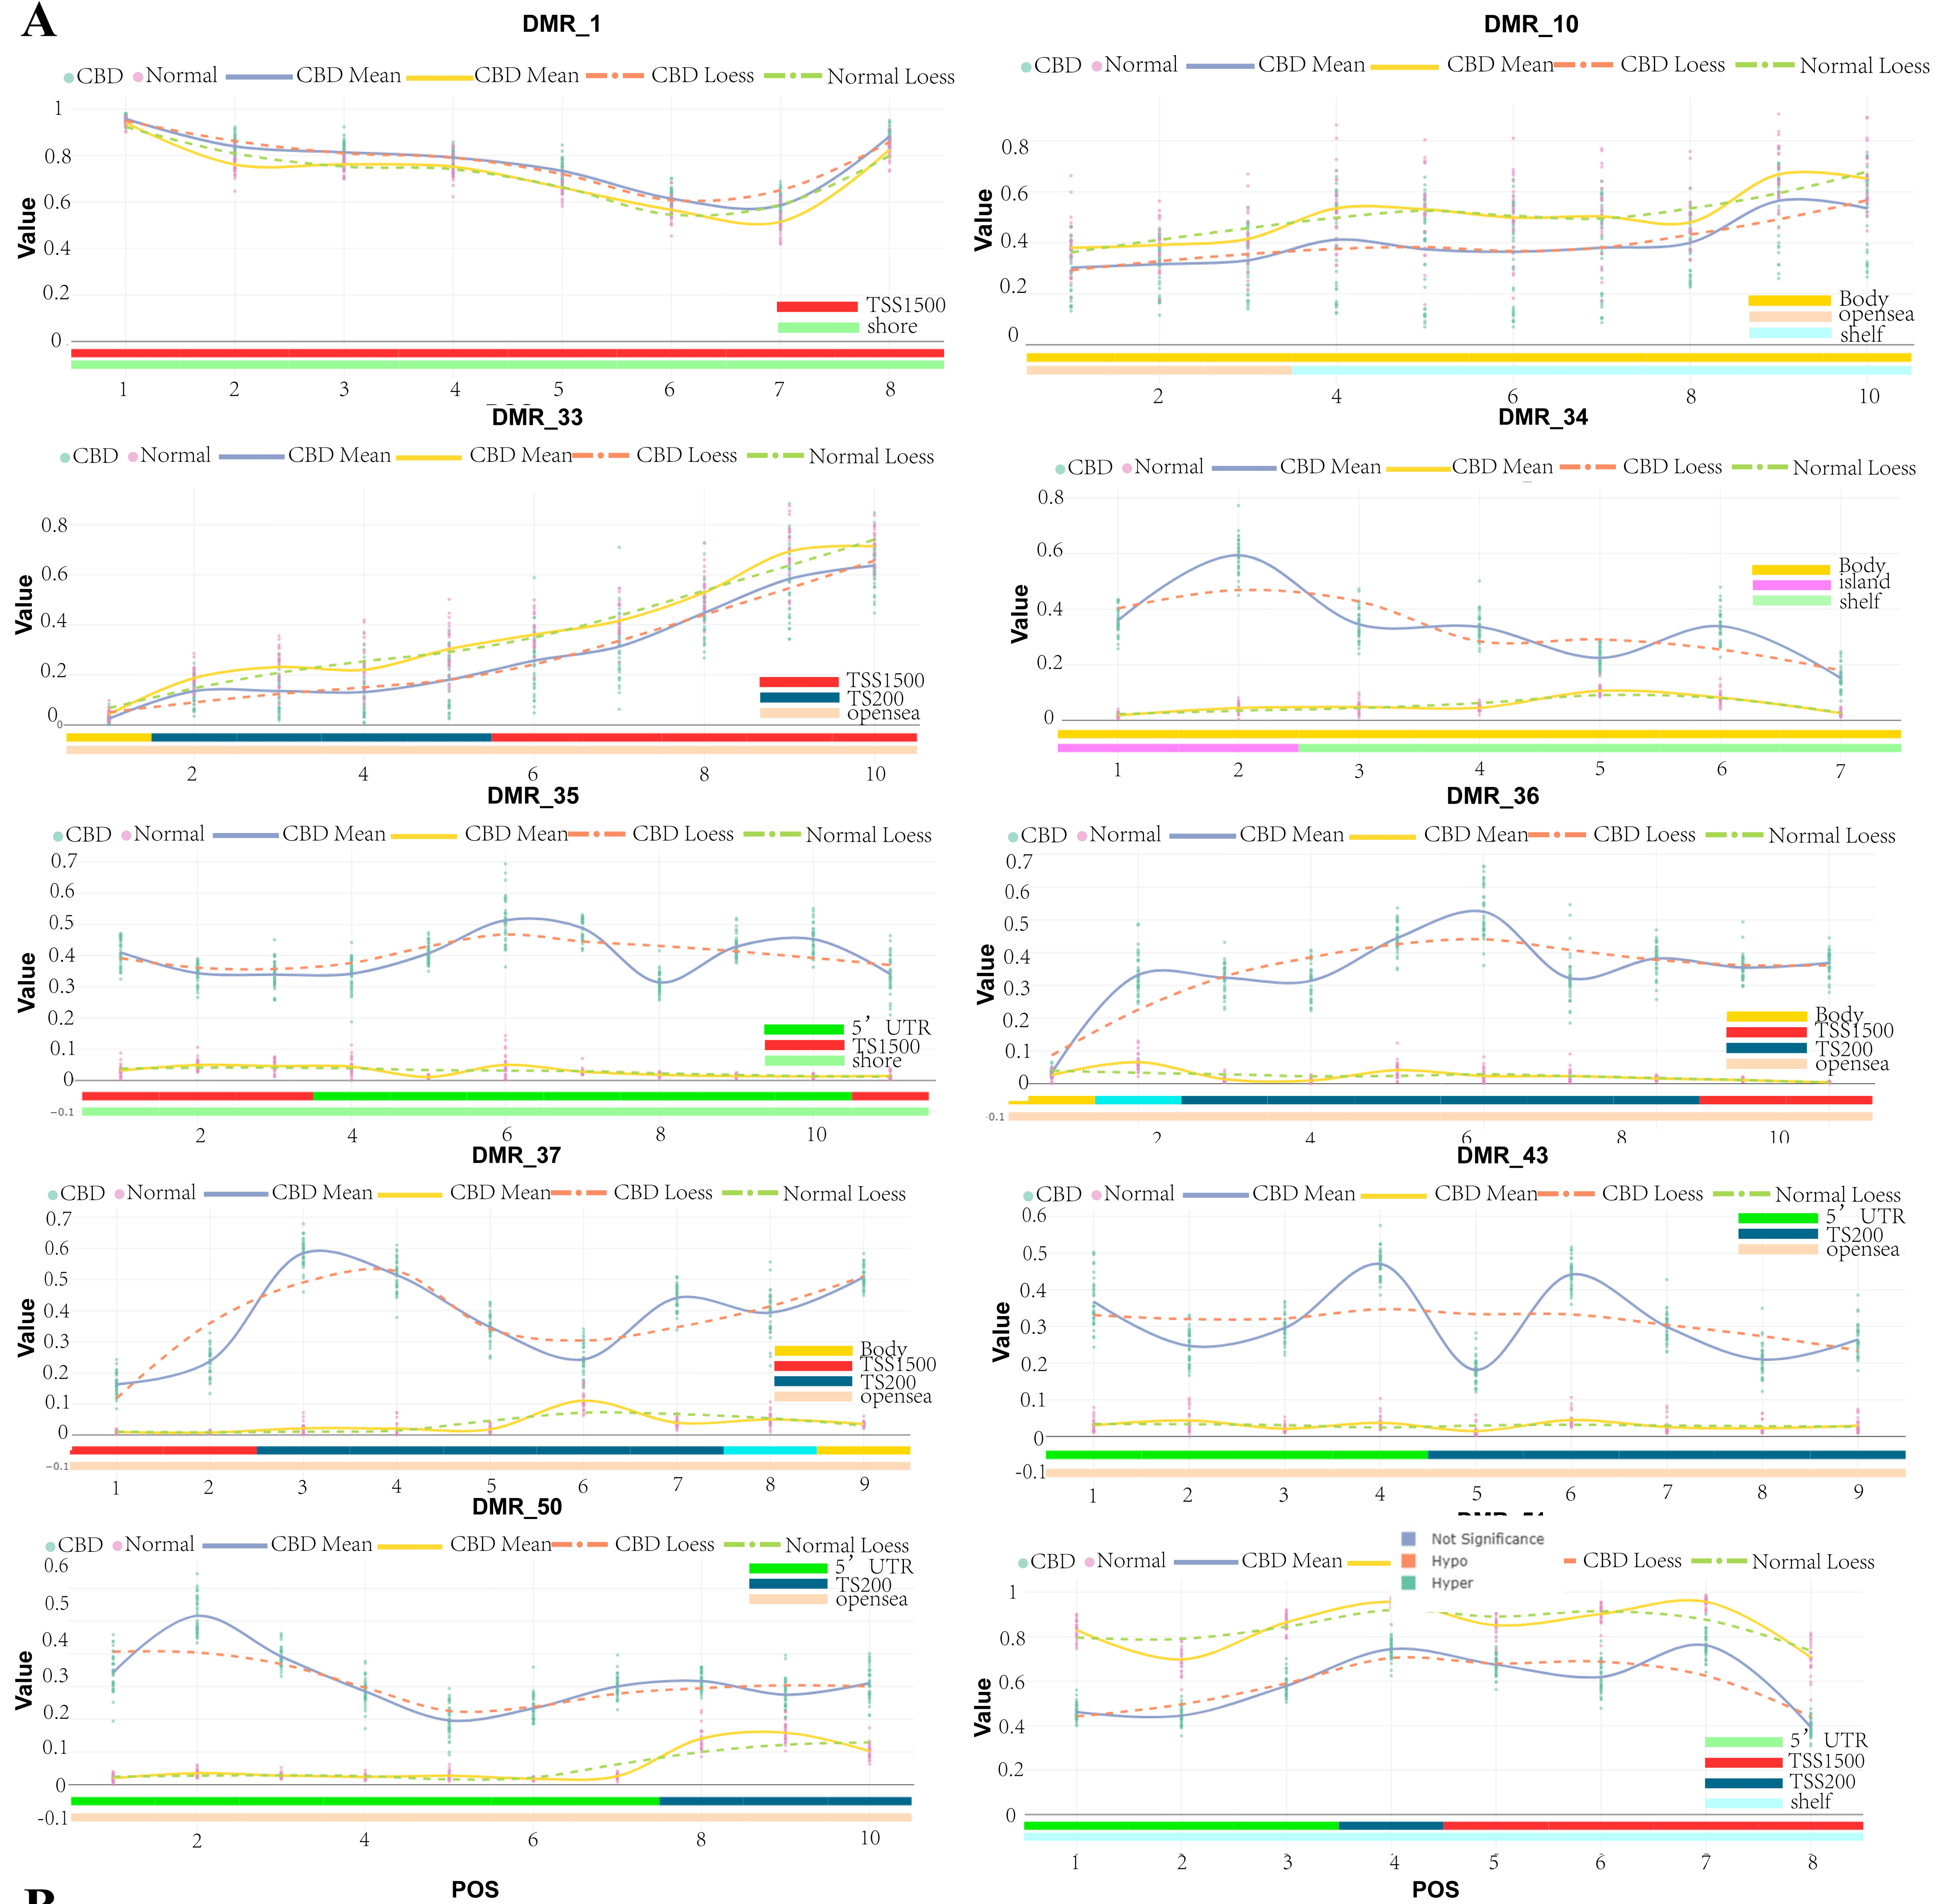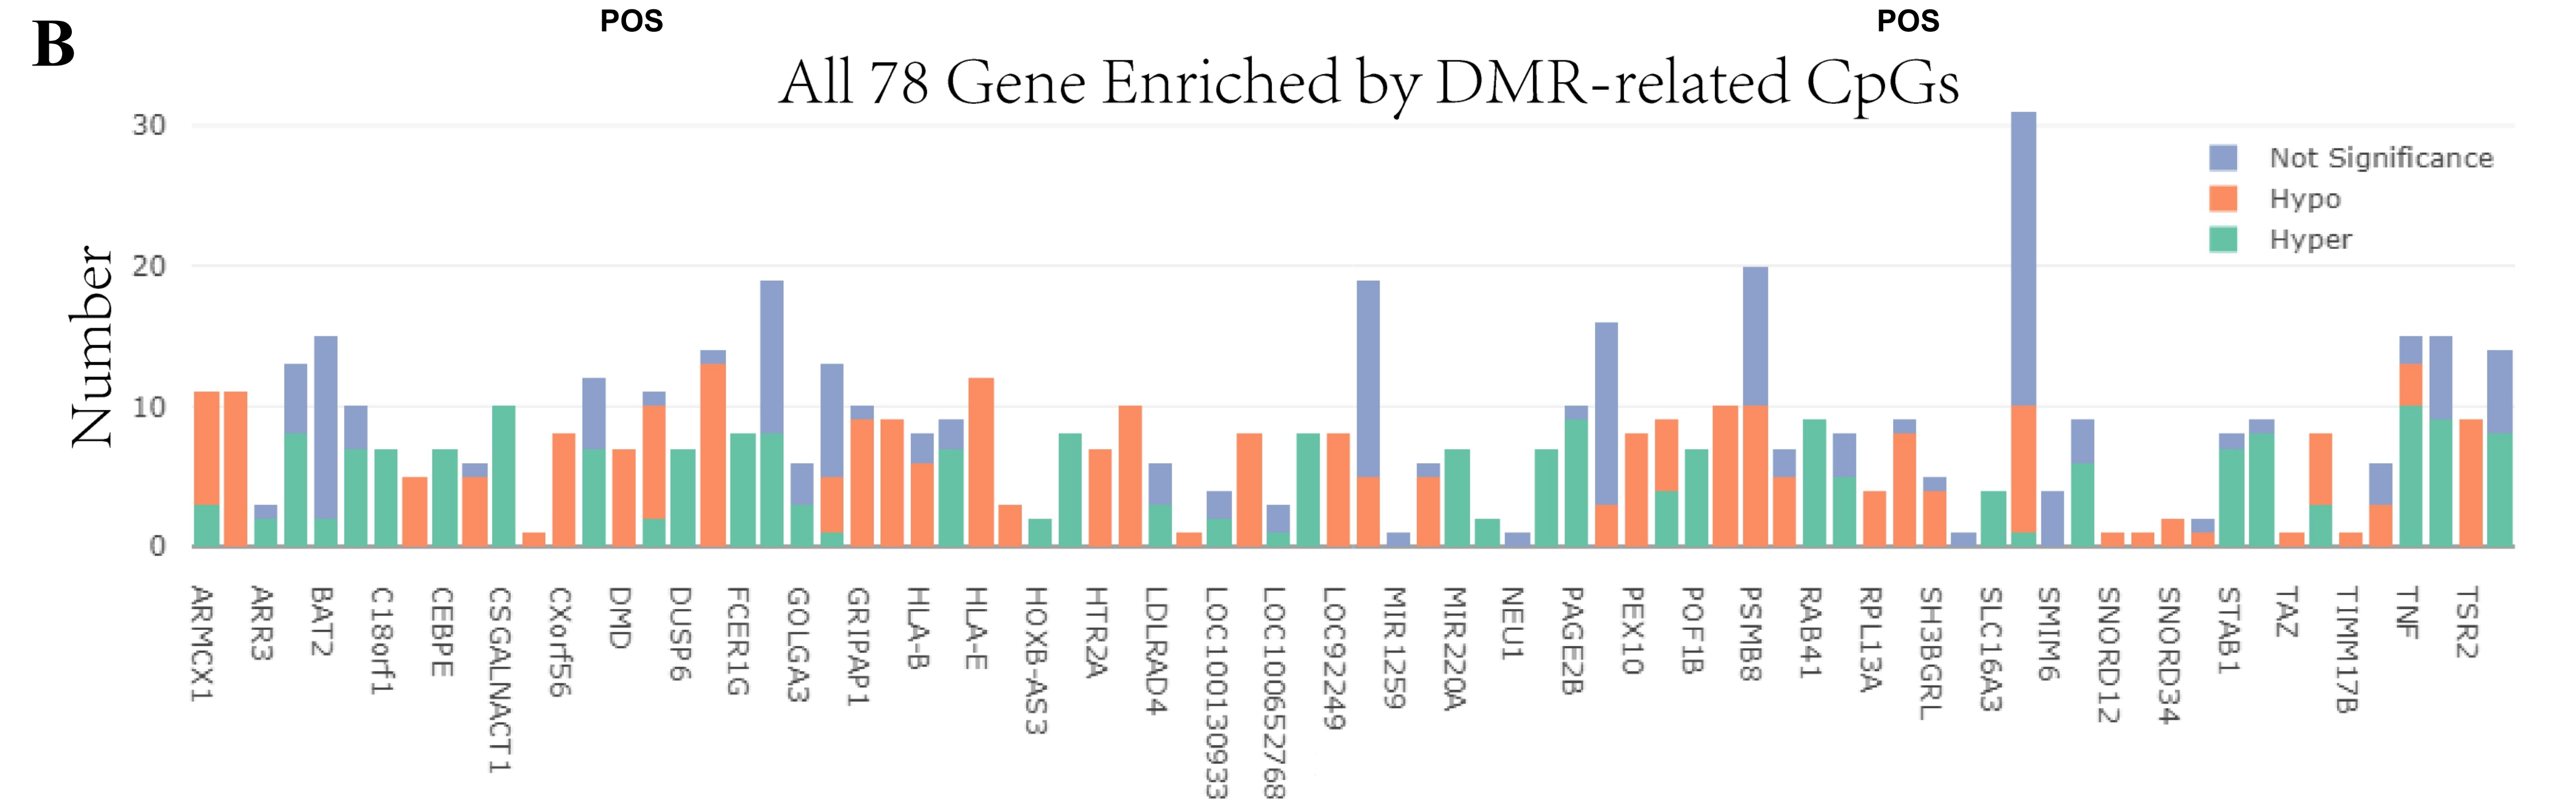

**A**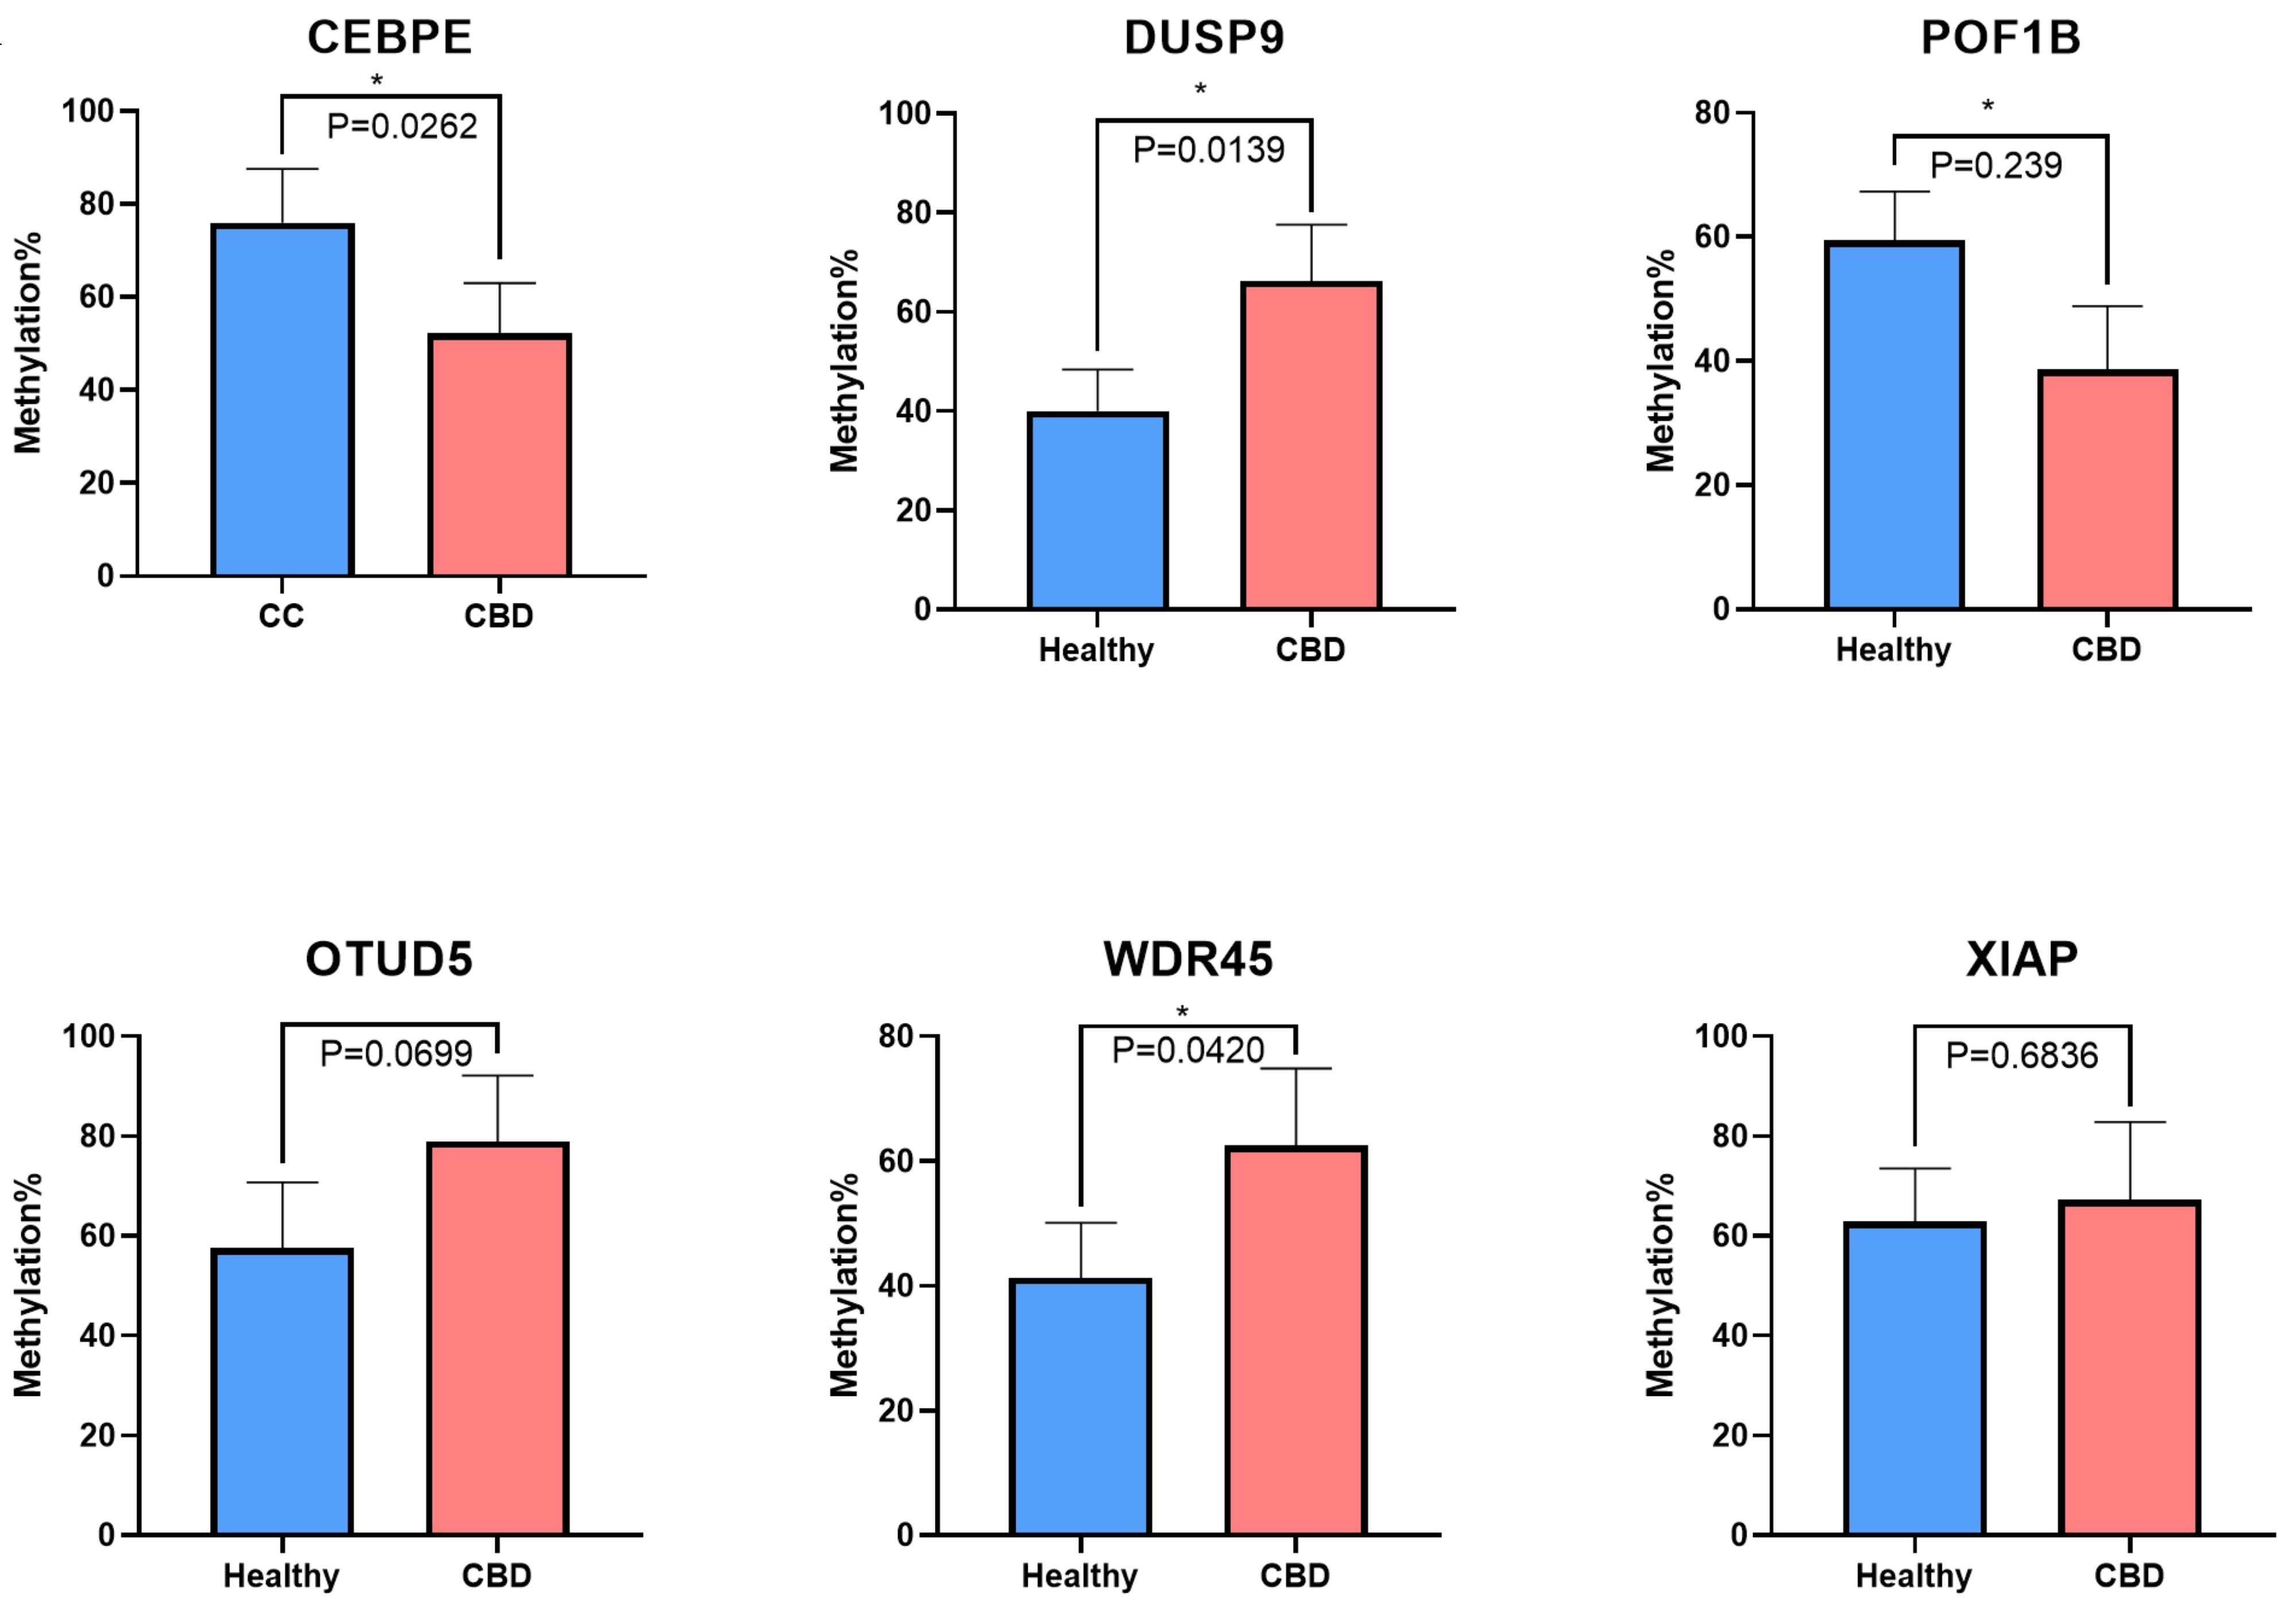**B**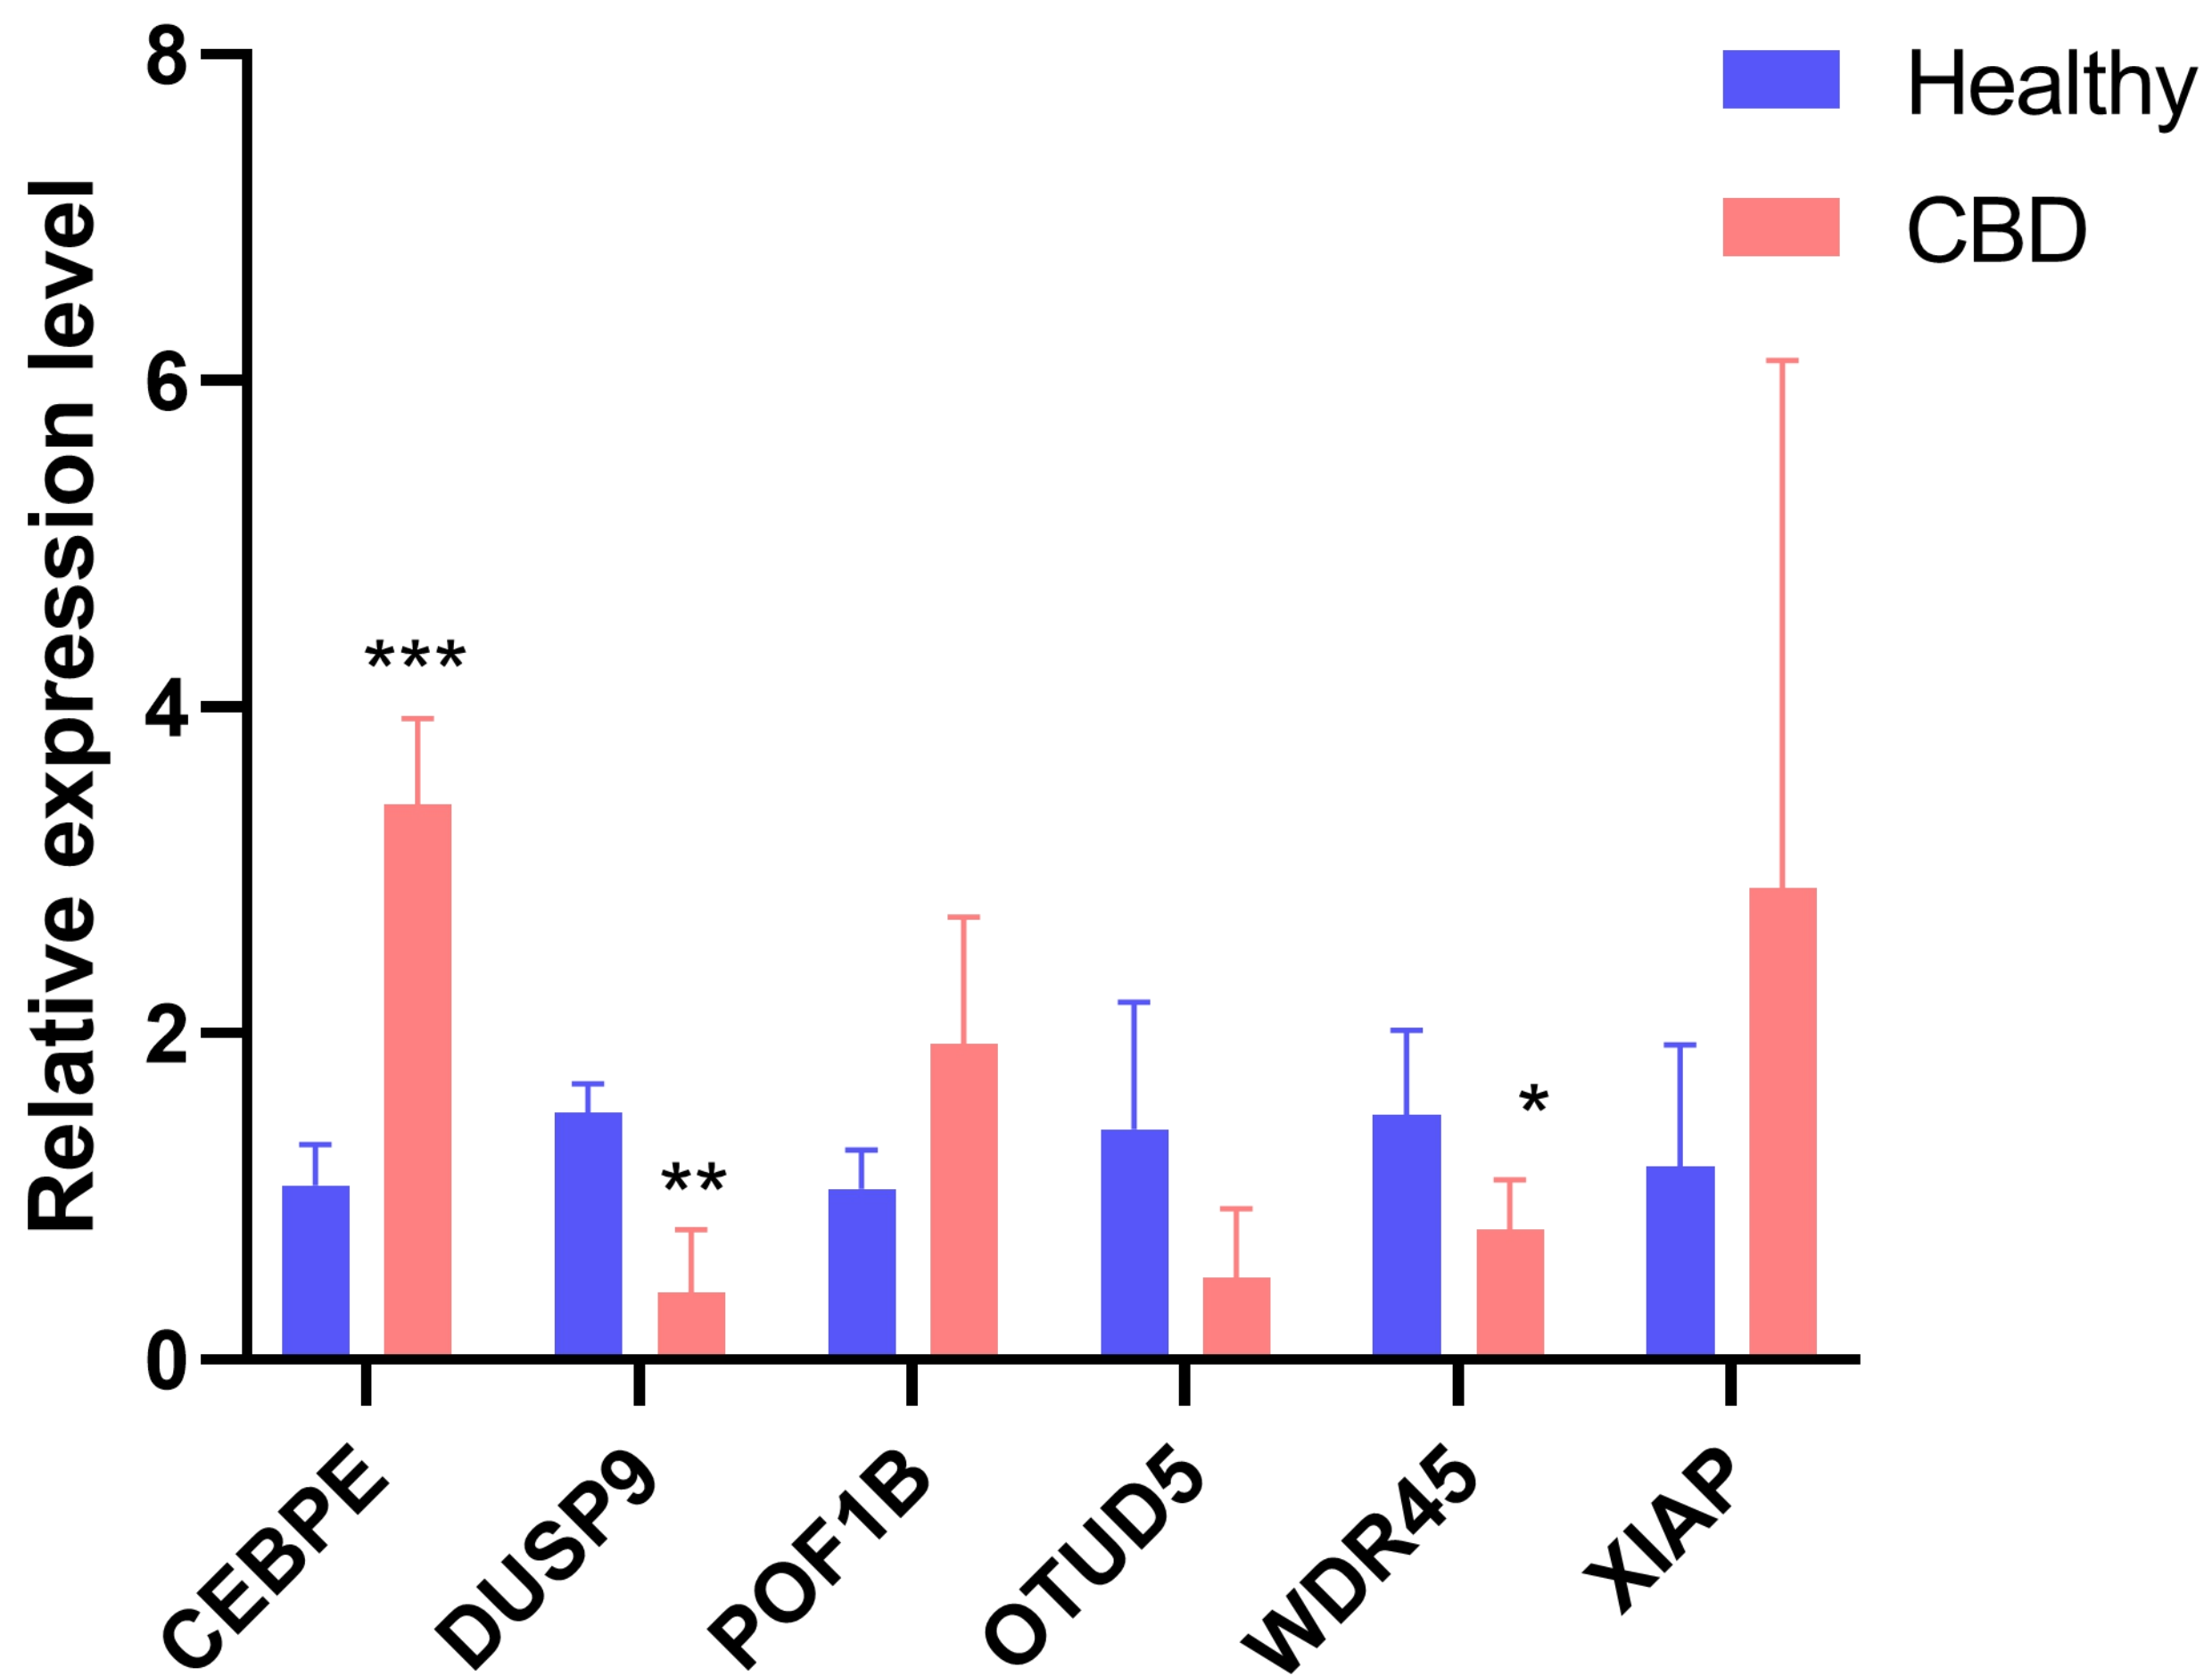

Supplement: MOESM2 [file 12920_2025_2223_MOESM2_ESM.pdf]
